1           **Human Herpes Virus 6 (HHV-6) - Pathogen or**  
2           **Passenger? A pilot study of clinical laboratory**  
3           **data and next generation sequencing**

4  
5           Colin Sharp<sup>a,b</sup>, Tanya Golubchik<sup>c,d</sup>, William F. Gregory<sup>a</sup>,  
6           Anna L. McNaughton<sup>e</sup>, Nicholas Gow<sup>f</sup>, Mathyruban Selvaratnam<sup>f</sup>,  
7           Alina Mirea<sup>f</sup>, Dona Foster<sup>g</sup>, Monique Andersson<sup>f</sup>,  
8           Paul Klenerman<sup>e,f</sup>, Katie Jeffery<sup>f</sup>, Philippa C. Matthews<sup>e,##</sup>

9  
10   <sup>a</sup> The Roslin Institute, University of Edinburgh, Easter Bush, Midlothian,  
11   Edinburgh, Scotland, UK

12   <sup>b</sup> Edinburgh Genomics, Ashworth Laboratories, University of Edinburgh,  
13   Edinburgh, EH9 3FL, Scotland, UK

14   <sup>c</sup> The Wellcome Trust Centre for Human Genetics, Roosevelt Drive, Oxford,  
15   OX3 7BN, UK

16   <sup>d</sup> Big Data Institute, University of Oxford, Old Road, Oxford, OX3 7FZ, UK

17   <sup>e</sup> Nuffield Department of Medicine, Peter Medawar Building for Pathogen  
18   Research, University of Oxford, South Parks Road, Oxford, OX1 3SY, UK

19   <sup>f</sup> Department of Infectious Diseases and Microbiology, Oxford University  
20   Hospitals NHS Foundation Trust, John Radcliffe Hospital, Headley Way,  
21   Headington, Oxford, OX3 9DU, UK

22   <sup>g</sup> NIHR Biomedical Research Centre, Nuffield Department of Medicine,  
23   University of Oxford, John Radcliffe Hospital, Headley Way, Headington,  
24   Oxford, OX3 9DU, UK

25

26

27 **# Corresponding author:** Philippa Matthews;

28 Email: [philippa.matthews@ndm.ox.ac.uk](mailto:philippa.matthews@ndm.ox.ac.uk)

29

30 **KEY WORDS:** Human herpesvirus 6, diagnosis, encephalitis, haematology,

31 metagenomics, next generation sequencing

32

33 **RUNNING TITLE:** HHV-6 epidemiology and diagnostics in a UK cohort

34

35

36 **ABSTRACT**

37 **Background:** Human herpes virus 6 (HHV-6) is a ubiquitous organism that  
38 can cause a variety of clinical syndromes ranging from short-lived rash and  
39 fever through to life-threatening encephalitis.

40 **Objectives:** We set out to generate observational data regarding the  
41 epidemiology of HHV-6 infection in clinical samples from a UK teaching  
42 hospital and to compare different diagnostic approaches.

43 **Study design:** First, we scrutinized HHV-6 detection in samples submitted to  
44 our hospital laboratory through routine diagnostic pathways. Second, we  
45 undertook a pilot study using Illumina next generation sequencing (NGS) to  
46 determine the frequency of HHV-6 in CSF and respiratory samples that were  
47 initially submitted to the laboratory for other diagnostic tests.

48 **Results:** Of 72 samples tested for HHV-6 by PCR at the request of a clinician,  
49 24 (33%) were positive for HHV-6. The majority of these patients were under  
50 the care of the haematology team (30/41, 73%), and there was a borderline  
51 association between HHV-6 detection and both Graft versus Host Disease  
52 (GvHD) and Central nervous system (CNS) disease ( $p=0.05$  in each case).  
53 We confirmed detection of HHV-6 DNA using NGS in 4/20 (20%) CSF and  
54 respiratory samples.

55 **Conclusions:** HHV-6 is common in clinical samples submitted from a high-  
56 risk haematology population, and enhanced screening of this group should be  
57 considered. NGS can be used to identify HHV-6 from a complex microbiome,  
58 but further controls are required to define the sensitivity and specificity, and to  
59 correlate these results with clinical disease. Our results underpin ongoing  
60 efforts to develop NGS technology for viral diagnostics.

61

62 **ABBREVIATIONS**

- 63 • cDNA – complementary DNA
- 64 • CiHHV-6 – Chromosomally integrated HHV-6
- 65 • CMV – Cytomegalovirus
- 66 • CNS – central nervous system
- 67 • CSF – cerebrospinal fluid
- 68 • EPR – Electronic patient record
- 69 • GvHD – graft versus host disease
- 70 • HHV-6 - Human herpes-virus-6
- 71 • HLA – human leucocyte antigen
- 72 • HSCT - Haematopoietic stem cell transplant
- 73 • HSV – Herpes Simplex Virus
- 74 • HTLV – Human T cell lymphotropic virus
- 75 • NGS – Next Generation Sequencing
- 76 • OUH – Oxford University Hospitals NHS Foundation Trust
- 77 • PCR – Polymerase Chain Reaction
- 78 • RSV – Respiratory Syncytial Virus
- 79 • VZV – Varicella Zoster Virus

80

81

## 82 **BACKGROUND**

83 Human herpes-virus-6 (HHV-6) is a human beta-herpesvirus (1). Like its close  
84 relative human cytomegalovirus (CMV), it is ubiquitous, has the potential for  
85 latency followed by chronic low level replication or reactivation, and may  
86 modulate immune responses to other pathogens (2-5). In children, is usually  
87 asymptomatic or associated with self-limiting fever and rash. It is also  
88 associated with encephalitis either as a primary agent (6) or as a result of  
89 reactivation in the setting of encephalitis / meningitis caused by other  
90 pathogens, in which context it appears generally benign (7). At the other end  
91 of the spectrum, HHV-6 can reactivate in the context of severe sepsis (8) and  
92 is a cause of potentially life-threatening pathology in patients with  
93 haematological malignancy, usually following HSCT (haematopoietic stem cell  
94 transplant) (9-15).

95

96 HHV-6 variants A and B share approximately 90% homology (16). HHV-6A  
97 accounts for more CiHHV-6 (17), while HHV-6B is associated with acute  
98 infection, childhood rash/fever (4), and reactivation following HSCT (16).  
99 Although HHV-6A is less common in CNS disease (18), it may be more  
100 aggressive when present (16). HHV-6 transmission is predominantly via  
101 respiratory secretions or saliva, but can also be vertical as a result of  
102 chromosomally-integrated HHV-6, 'CiHHV-6' (17, 19), leading either to  
103 episodic reactivation (17), or to persistent viraemia (typically  $\geq 5.5 \log_{10}$   
104 copies/ml (~300,000 copies/ml) in blood (20)).

105

106 HHV-6 laboratory diagnostics raise a number of challenges: what sample type  
107 to test, in which patient groups to focus, and how to interpret a positive test  
108 result. There is increasing interest in ‘next generation sequencing’ (NGS)  
109 approaches to diagnosis of many pathogens (21-25) but optimization is  
110 required for these pipelines, including tackling high proportions of human  
111 reads, differentiating between pathogenic organisms and commensal /  
112 environmental flora, and determining thresholds at which the identification of  
113 an organism is likely to be clinically significant (26).

114

## 115 **OBJECTIVES**

116 We set out to review HHV-6 data from the local diagnostic microbiology  
117 laboratory, to determine the patterns of clinical testing for HHV-6. Second, we  
118 screened randomly selected CSF and respiratory samples using PCR and  
119 NGS in a small pilot study to ascertain the extent to which this virus can be  
120 detected in routine samples. Together, these aim to describe the distribution  
121 of HHV-6 in local clinical samples, and to evaluate the contribution made by  
122 different diagnostic tools, thereby informing ongoing development of  
123 laboratory protocols for diagnosis.

124

## 125 **STUDY DESIGN**

### 126 ***Study site, cohorts and ethics***

127 Clinical data and samples from between 2013-2016 were collected from the  
128 microbiology department at Oxford University Hospitals (OUH) NHS  
129 Foundation Trust, a large tertiary referral teaching centre in the UK

130 (<http://www.ouh.nhs.uk/>). This study pertains to the analysis of two separate  
131 sample cohorts (Suppl data set 1):

132 i. Samples submitted to the laboratory by clinicians with a request for  
133 **HHV-6** screening (ID numbers prefixed **HHV**). This is undertaken at the  
134 request of the clinical team when deemed clinically relevant;

135 ii. Samples which had no request for HHV-6 testing, but had completed  
136 routine diagnostic laboratory testing for other indications and were  
137 used for viral sequencing studies (ID numbers prefixed **VS**).

138

139 Approval for retrospective collection of clinical and laboratory data was  
140 granted by the OUH Clinical Audit Committee (HHV cohort). Testing of  
141 consecutive anonymised laboratory samples (VS cohort) was approved by  
142 local Research Services and through review via the UK Integrated Research  
143 Application System (REC Reference 14/LO/1077).

144

#### 145 ***Collection of local laboratory data (HHV cohort)***

146 We undertook an electronic search of the OUH Microbiology laboratory  
147 system to identify all instances of an HHV-6 test (antibody or viral load) being  
148 requested over three years commencing 1-Jan-2013, and recorded age, sex,  
149 sample type and patient location. We used the Electronic Patient Record  
150 (EPR) to determine underlying diagnosis. Follow-up data for survivors were  
151 available for a median of 25 months (range 316 – 1374 days). Diagnostic  
152 tests were undertaken by in-house real time PCR assays (27) at two different  
153 National Reference Laboratories (Colindale up to 1-Oct-2014, and  
154 subsequently Bristol).

155

156 ***Data collection and statistical analysis***

157 We used GraphPad Prism v.6.0f for statistical analysis with Fisher's Exact  
158 Test to identify differences between binary groups, and the Mann Whitney U  
159 test for continuous variables. Multivariate regression analysis was undertaken  
160 using open access on-line software  
161 (<https://docs.google.com/spreadsheets/u/0/>).

162

163 ***Testing CSF and respiratory samples (VS cohort)***

164 We identified 100 CSF samples and 100 respiratory samples (throat swabs  
165 (n=22), nasopharyngeal aspirates (n=42), endotracheal aspirates (n=4), and  
166 bronchoalveolar lavage samples (n=32)) representing a 'high risk' subgroup  
167 based on the following criteria:

- 168 i. For CSF, the clinical request for testing included viral causes of  
169 meningitis and encephalitis;
- 170 ii. For respiratory samples, the patient had a clinical history of  
171 immunocompromise and/or was on the intensive care unit.

172

173 ***PCR and NGS (VS cohort)***

174 Samples had all undergone clinical laboratory testing and were stored at -  
175 80°C prior to further processing. We selected consecutive samples; the only  
176 exclusion criterion was inadequate sample volume (<200 ul). For each  
177 sample, we documented patient age group and clinical location, and recorded  
178 the clinical information supplied with the sample and routine microbiology  
179 laboratory data.



180

181 Nucleic acids were extracted from 200µl of each sample using the AllPrep  
182 DNA/RNA Mini Kit (Qiagen) and recovered in 30µl of nuclease-free water. To  
183 allow for broad detection of HHV-6 and other known herpesviruses, 4ul of  
184 DNA was used as template for a consensus PCR primer as previously  
185 published (28). The results were visualised on 2% agarose gels and  
186 amplicons from positive reactions were cut from the gels for sequencing.  
187 Direct amplicon sequencing was performed using BigDye Terminator v3.1  
188 (Applied Biosystems) according to the manufacturer's instructions with both  
189 second round primers. Sequencing reactions were read by Edinburgh  
190 Genomics and assembled using SSE v1.2 (29).

191

192 We selected a random subset of 20 samples for Illumina sequencing.  
193 Methods are described in detail in another manuscript (30).

194

## 195 **RESULTS**

### 196 ***Routine clinical samples received for HHV-6 testing (HHV cohort)***

197 During the three-year study period, our clinical laboratory received 85  
198 samples for HHV-6 testing (Fig 1A; suppl data set 1). In total, 41 patients were  
199 tested; 22 M:19 F; median age 52 years (range 2-71; IQR 39-61). Central  
200 nervous system (CNS) disease (encephalitis, encephalopathy, meningism,  
201 seizures) was present in 9/41 (22%). Most patients were under haematology  
202 care (30/41; 73%), of these, 5/30 (17%) had Graft versus Host Disease  
203 (GvHD). 72/85 samples were tested for HHV-6 DNA by PCR at the reference  
204 laboratory; 24/72 (33%) were positive. Among individual patients tested, 15/41

205 (37%) were PCR positive at  $\geq 1$  timepoint (Fig 1A). Of seven samples that  
206 were subtyped, all were HHV-6B.

207

208 Positive HHV-6 status was not statistically associated with age, sex, or  
209 haematological malignancy (Table 1). There was a borderline association with  
210 both GvHD and CNS disease (both  $p=0.05$ ; Table 1; Fig. 2A and B), but this is  
211 difficult to interpret as patients in these groups are more likely to be selected  
212 for HHV6 testing. On multiple logistic regression analysis, there was no  
213 relationship between HHV-6-positivity and any other characteristic (Table 1).

214

215 In this cohort, 23/41 (56%) of patients died, at a median age of 56 years.  
216 Among these, 11/23 (48%) had tested HHV-6-PCR positive, compared to 4/18  
217 (22%) of surviving patients ( $p=0.1$ ). All those who died did so within 19  
218 months of the HHV-6 test (range 1-552 days, median 163 days), and all  
219 patients with HHV6 detected in the CSF died (Fig 2C). We did not have  
220 sufficient clinical data to determine cause of death, and HHV6 may be a  
221 bystander in this complex cohort.

222

### 223 ***Quantification of HHV-6 viral load in blood and CSF (HHV cohort)***

224 HHV-6 DNA was quantified in 23 samples from ten patients (Fig 2C). The  
225 levels varied from below the threshold for accurate quantification, to patient  
226 HHV-012 with  $>1.0 \times 10^6$  copies/ml in blood and  $2.0 \times 10^8$  DNA copies/ml in  
227 CSF, suggesting CiHHV-6. Patient HHV-007, an adult with haematological  
228 malignancy, had HHV-6 DNA detected in both blood and CSF ( $9 \times 10^4$  DNA  
229 copies/ml vs.  $3 \times 10^5$  copies/ml, respectively). This patient had limbic

230 encephalitis, and the raised HHV-6 titre in CSF compared to blood is in  
231 keeping with a localized CNS pathology caused by the virus.

232

233 Among a total of 72 tests, 46 were longitudinal samples from thirteen  
234 individual patients. There was no statistical association between multiple  
235 HHV-6 tests and other factors that might predict disease severity ( $p>0.1$  for  
236 age, sex, mortality, haematological malignancy, transplant, intensive care  
237 location, documented co-infection in multiple regression analysis).

238

239 ***Screening laboratory samples for HHV-6 by PCR (VS cohort)***

240 We screened CSF ( $n=100$ ) and respiratory ( $n=100$ ) samples for herpesvirus  
241 DNA by PCR and sequencing (Fig 1B; Suppl data set 1), identifying HHV-6 in  
242 3/100 CSF samples and 5/100 respiratory samples (Table 2). Four of the  
243 eight positive cases were age  $<5$  years, representing the age group in whom  
244 primary HHV-6 infection is most likely. However, in four samples (two adults  
245 and two children) an alternative pathogen was identified by the clinical lab  
246 (Table 2), illustrating the difficulty in distinguishing between HHV-6 as a  
247 primary pathogen, a co-infecting agent contributing to pathology, or an  
248 innocent bystander.

249

250 The overall HHV-6 prevalence of 4% in this random group of samples is  
251 significantly lower than the 33% rate obtained from the samples in which the  
252 clinician had requested HHV-6 testing ( $p<0.0001$ ; Fisher's Exact Test). This  
253 suggests that the targeting of the highest risk groups (primarily patients with  
254 haematological malignancy) for HHV-6 testing is appropriate, and that the

255 high prevalence of detectable HHV-6 DNA in this group is not merely  
256 reflective of universal reactivation of herpesviruses in a hospital cohort.

257

258 ***Screening laboratory samples for HHV-6 DNA by NGS (VS cohort)***

259 We screened a subset of 20 samples (10 CSF and 10 respiratory; Fig 1B)  
260 using a metagenomic (NGS) approach (30), identifying HHV-6 in four samples  
261 that we deemed 'positive'; one CSF and three respiratory samples (Table 3;  
262 Fig 3). The number and distribution of reads in each sample is shown in Fig  
263 4A. Sample VS183 was designated HHV-6B by Kraken, while the other three  
264 positive samples were identified as HHV-6A (Fig 4B). The coverage of the  
265 HHV-6 genome was incomplete, but multiple reads distributed across the  
266 genome (Fig 4B), add confidence to the conclusion that HHV-6 DNA is  
267 genuinely present in these samples. The sequence data have been uploaded  
268 to European Nucleotide Archive (ENA) <https://www.ebi.ac.uk/ena>; HHV6  
269 sequence accession numbers ERS1980462 (sample ID VS067),  
270 ERS1980463 (VS183), ERS1980464 (VS200) and ERS1980465 (VS207).  
271 Links to the full metagenomic sequence set can be found in our supporting  
272 Data Note (30).

273

274 In VS067, the clinical syndrome was not explained by other diagnostic results,  
275 and HHV-6 infection was a plausible agent of the clinical syndrome  
276 (meningoencephalitis). In the three other cases, other primary pathogens had  
277 been identified (Table 3), although it is plausible that HHV-6 could have been  
278 a contributory agent.

279

280 Among the total of eight samples that were HHV-6 positive by conventional  
281 PCR, three were tested on the NGS pipeline (samples VS114, VS121 and  
282 VS183). HHV-6 reads were detected by NGS in all three, although two had  
283 low numbers of reads leading us to classify them as equivocal (Fig 4A,B).  
284 Conversely, in four samples where HHV-6 was detected by NGS, only one of  
285 these was positive by PCR.

286

## 287 **DISCUSSION**

288 This preliminary study provides insight into the distribution of HHV-6 in a  
289 range of samples in a UK teaching hospital, with the long-term aim of  
290 informing improvements in diagnostic testing. Although our NGS data only  
291 represent a small pilot study, we have identified only a single other reference  
292 to date that describes a metagenomic approach to the diagnosis of HHV-6  
293 infection (6). Although HHV-6 can reactivate in the context of any critical  
294 illness (8), we here found a higher prevalence in clinical samples taken from a  
295 high-risk group (HHV cohort) than in laboratory samples representing an  
296 unwell hospital population (VS cohort), suggesting that HHV-6 is not simply  
297 reactivating across the board in hospitalized patients. The combination of a  
298 high rate of HHV-6 DNA detection and the high mortality in the clinical (HHV)  
299 cohort, suggest that we should consider lowering our threshold for testing in  
300 this context. Longitudinal HHV-6 PCR testing should generally be reserved for  
301 monitoring response to therapy, but if a high index of suspicion exists (e.g. a  
302 profoundly immunosuppressed patient who becomes encephalopathic in the  
303 absence of an alternative explanation), then serial testing may be helpful.

304

305 This study was not designed to evaluate the use or outcome of antiviral  
306 therapy as this information could not robustly be captured retrospectively.  
307 There are some data to suggest good outcomes from treatment of  
308 symptomatic viraemia (31), with ganciclovir and/or foscarnet. However, there  
309 is no universally agreed definition of clinical disease or threshold for therapy  
310 and this area is not well informed by clinical trials (32); the gains made by  
311 testing early have to be carefully balanced against the possibility of identifying  
312 patients with bystander viral reactivation in whom the toxicity and side-effects  
313 of treatment would not be justified. Further studies, including NGS, may  
314 determine whether different clinical syndromes are consistently associated  
315 with the two HHV-6 subtypes.

316

317 For samples with low HHV-6 copy numbers, PCR is anticipated to be more  
318 sensitive than NGS; this is illustrated by two samples that tested positive by  
319 PCR but were equivocal by NGS. However, the overall proportion of samples  
320 testing positive for HHV-6 DNA was higher by NGS than by PCR. This may at  
321 least in part be accounted for by PCR using highly degenerate herpesvirus  
322 primers, followed by sequencing primers that have a higher degree of  
323 sequence homology for HHV-6B than HHV-6A (28).

324

325 In screening by NGS, we identified HHV-6 in 4/20 (20%) samples, using a  
326 combination of read numbers and genome coverage to infer positivity (33).  
327 Multiple considerations feed into the interpretation of NGS data (Fig 5). The  
328 four patients positive for HHV-6 by NGS in this cohort all had clinical  
329 syndromes that could be compatible with HHV-6 infection, but due to a limited

330 dataset we cannot attribute causality. Interestingly, positive HHV-6 PCR from  
331 young children with severe respiratory tract infections suggest a potential  
332 pathological role of the virus that is not well described in this population to  
333 date. In future, in situations when HHV-6 detection is deemed significant, this  
334 could support the introduction of antiviral therapy, and/or reduce exposure to  
335 broad-spectrum antibiotics.

336

337 The number of clinical requests for HHV-6 testing each year is small, even in  
338 a tertiary referral teaching hospital. By nature, our clinical sample set (HHV  
339 cohort) was strongly skewed towards sampling a high-risk population. Our  
340 data quality is dependent upon the completeness of electronic data, and it  
341 was not possible to determine temporality. For ongoing NGS work, priorities  
342 are screening blood samples, and development of positive internal controls to  
343 determining sensitivity. An international control standard for HHV-6 is  
344 currently being prepared by the National Institute for Biological Standards and  
345 Control (NIBSC).

346

347 Although it is doubtless at times a benign passenger, HHV-6 is indeed  
348 significantly associated with the clinical syndromes that arise in patients with  
349 profound immunocompromise in the haematology setting, and may have a  
350 role in other syndromes, including respiratory infections in children.  
351 Metagenomic approaches to clinical diagnostics are accelerating, and as  
352 additional data become available, increasing insights will be gained into the  
353 interpretation of these results.

354

355

356 **FUNDING**

357 PCM is funded by a Wellcome Trust Intermediate Fellowship, grant number  
358 110110 and received salary from the NIHR during the clinical data collection  
359 phase of this work. A project grant to PCM from The British Infection  
360 Association (BIA; <https://www.britishinfection.org/>) covered the costs of  
361 laboratory staff and consumables for undertaking PCR and metagenomic  
362 screening of CSF and respiratory samples. The funders had no role in study  
363 design, data collection and interpretation, or the decision to submit the work  
364 for publication.

365

366 **ACKNOWLEDGEMENTS**

367 We are grateful to the Centre for Genomic Research (CGR), University of  
368 Liverpool, UK for running the HiSeq platform. Thank you to Dr Peter Muir  
369 (Public Health England South West Regional Laboratory, Southmead  
370 Hospital, Bristol), who provided valuable advice and discussion during data  
371 collection. A subset of these work were presented at the UK Federation of  
372 Infection Meeting, 2017 (34).

373

374 **CONFLICTS OF INTEREST**

375 None to declare.

376

377



378 **AUTHORSHIP**

379 Conceived and designed the experiments: CS, PK, PCM; Applied for ethics  
380 permission: PCM; Collected and curated clinical samples and data: MS, AM,  
381 NG, MA, KJ; Undertook laboratory work: CS, WFG; Analysed and presented  
382 the data: CS, TG, ALM, PCM; Wrote the article: CS, TG, ALM, DF, PCM, with  
383 feedback from all co-authors; Approved the final article: all authors.

384

385 **FIGURE LEGENDS**

386 **Figure 1: Schematic summary of work flow and output of HHV-6 testing**

387 **among clinical samples from a UK teaching hospital.** A: Flow diagram  
388 showing number of samples submitted to a hospital diagnostic microbiology  
389 laboratory with a clinical request for HHV-6 testing (sample ID's prefixed with  
390 HHV). \*'Wrong test' indicates request for HHV-6 antibody (rather than PCR).

391 B: Flow diagram showing consecutive random samples (sample ID's prefixed  
392 with VS) screened for herpesviruses (i) by PCR with HHV-6 confirmed by  
393 sequencing, and (ii) by a metagenomic approach. These samples had been  
394 submitted to the clinical laboratory for other reasons, and had reached the  
395 end of their diagnostic testing pathway.

396

397 **Figure 2: Results of clinical laboratory testing for HHV-6 in blood and**

398 **CSF samples at the request of the clinical team.** A: Relationship between  
399 presence or absence of Graft vs Host Disease (GvHD) and HHV-6 status; P  
400 value by Fisher's exact test. B: Relationship between presence or absence of  
401 a clinical Central Nervous System (CNS) syndrome and HHV-6 status; P  
402 value by Fisher's exact test. C: HHV-6 viral loads in blood and CSF; P value

403 by Mann Whitney test; individuals who died are shown in red. In all three  
404 panels, the numbers at the top of each column show the total number of  
405 patients represented.

406

407 **Figure 3: Multi-layered pie charts generated to visualize the metavirome**  
408 **from a respiratory sample taken from a child.** Krona was used to generate  
409 the metagenomic visualization of these data (35). The sample was a  
410 nasopharyngeal aspirate taken from patient ID VS183 (a child age <5 with a  
411 clinical syndrome described by the requesting clinician as 'viral infection'). (A)  
412 HHV-6B (in pink) shown as a proportion of all viral reads; (B) HHV-6B (in pink)  
413 shown as a proportion of all virus contigs. The other two predominant viruses  
414 represented in both panels are Torque Teno Mini Virus (in red), a ubiquitous  
415 and non-pathogenic virus, and Enterobacteria phage Phi X (in purple), which  
416 is an artefact of the sequencing method (spike used for positive control in  
417 Illumina sequencing run); these illustrate a high proportion of sequence reads  
418 generated from organisms that are not clinically significant.

419

420 **Figure 4: Detection of HHV-6 DNA in unselected CSF and respiratory**  
421 **samples.** A: Read numbers determined by next generation sequencing  
422 (NGS) according to sample type. The y-axis refers to the number of uniquely  
423 mapping HHV6 reads, representing deduplicated read numbers ( $Q > 30$ ). The  
424 areas shaded green, blue and yellow represent suggested thresholds for  
425 samples to be classified as negative, equivocal or positive, respectively. White  
426 gaps between the colours illustrate that the exact position of the boundaries  
427 between these areas are uncertain. Those classified as equivocal were all

428 respiratory samples, and the sequences clustered in the repeat region of the  
429 genome, suggesting lower specificity for HHV-6.

430 B: Plots generated with Burrows-Wheeler Aligner (BWA) to illustrate coverage  
431 of HHV-6 genomes against consensus. The x-axis of the plot represents the  
432 full length genome for HHV-6, with HHV-6A shown in triangles, and HHV-6B  
433 shown in circles. From a total of 20 samples tested, we show data for samples  
434 from which we generated any HHV-6 reads. The beginning position of each  
435 read is indicated. The grey bars indicate repeat regions (low variability) as  
436 defined in the methods; for a sample to be considered positive, we stipulated  
437 that the reads should fall outside these regions of the genome.

438

439 **Figure 5: Suggested algorithm showing process of determining the**  
440 **significance of an organism identified from a clinical sample by next**  
441 **generation sequencing (NGS).** This represents a structure that can be  
442 applied to bioinformatics and clinical interpretation of metagenomic data. We  
443 recognize that the approach and thresholds are different for different  
444 organisms, and that robust output also depends also on optimization of *in vitro*  
445 sample preparation.

446

447

448 **SUPPLEMENTARY RESOURCES**

449

450 **Suppl data set 1. Human Herpes Virus 6 (HHV-6): a study of clinical**  
451 **laboratory data and next generation sequencing;**  
452 **<https://doi.org/10.6084/m9.figshare.5671153.v1>.**

453 This fileset includes the following:

- 454 • HHV6 cohort metadata (clinical cohort data to describe patients  
455 undergoing clinical testing for HHV-6 infection) as .xlsx and .csv files;
- 456 • VS cohort metadata (research cohort data to describe CSF and  
457 respiratory samples underdoing screening for HHV-6 infection using  
458 PCR and next generation sequencing) as .xlsx and .csv files.

459

460

461

462

463 **REFERENCES**

- 464 1. **Salahuddin SZ, Ablashi DV, Markham PD, Josephs SF,**  
465 **Sturzenegger S, Kaplan M, Halligan G, Biberfeld P, Wong-Staal F,**  
466 **Kramarsky B, et al.** 1986. Isolation of a new virus, HBLV, in patients  
467 with lymphoproliferative disorders. *Science* **234**:596-601.
- 468 2. **De Bolle L, Naesens L, De Clercq E.** 2005. Update on human  
469 herpesvirus 6 biology, clinical features, and therapy. *Clinical*  
470 *microbiology reviews* **18**:217-245.
- 471 3. **Adland E, Klenerman P, Goulder P, Matthews PC.** 2015. Ongoing  
472 burden of disease and mortality from HIV/CMV coinfection in Africa in  
473 the antiretroviral therapy era. *Front Microbiol* **6**:1016.
- 474 4. **Abdel Massih RC, Razonable RR.** 2009. Human herpesvirus 6  
475 infections after liver transplantation. *World journal of gastroenterology* :  
476 *WJG* **15**:2561-2569.
- 477 5. **Loutfy SA, Fawzy M, El-Wakil M, Moneer MM.** 2010. Presence of  
478 human herpes virus 6 (HHV6) in pediatric lymphomas: impact on  
479 clinical course and association with cytomegalovirus infection. *Virology* **7**:287.
- 481 6. **Kawada J, Okuno Y, Torii Y, Okada R, Hayano S, Ando S, Kamiya**  
482 **Y, Kojima S, Ito Y.** 2016. Identification of Viruses in Cases of Pediatric  
483 Acute Encephalitis and Encephalopathy Using Next-Generation  
484 Sequencing. *Sci Rep* **6**:33452.
- 485 7. **Labska K, Roubalova K, Picha D, Maresova V.** 2015. Presence of  
486 herpesvirus DNA in cerebrospinal fluid of patients with tick-borne

- 487           encephalitis and enteroviral meningoencephalitis. Journal of medical  
488           virology **87**:1235-1240.
- 489   8.   **Ong DSY, Bonten MJM, Spitoni C, Verduyn Lunel FM, Frencken**  
490       **JF, Horn J, Schultz MJ, van der Poll T, Klein Klouwenberg PMC,**  
491       **Cremer OL, Molecular D, Risk Stratification of Sepsis C.** 2017.  
492       Epidemiology of Multiple Herpes Viremia in Previously  
493       Immunocompetent Patients With Septic Shock. Clinical infectious  
494       diseases : an official publication of the Infectious Diseases Society of  
495       America **64**:1204-1210.
- 496   9.   **Ogata M, Satou T, Kadota J, Saito N, Yoshida T, Okumura H, Ueki**  
497       **T, Nagafuji K, Kako S, Uoshima N, Tsudo M, Itamura H, Fukuda T.**  
498       2013. Human herpesvirus 6 (HHV-6) reactivation and HHV-6  
499       encephalitis after allogeneic hematopoietic cell transplantation: a  
500       multicenter, prospective study. Clinical infectious diseases : an official  
501       publication of the Infectious Diseases Society of America **57**:671-681.
- 502   10.   **de Pagter PJ, Schuurman R, Keukens L, Schutten M, Cornelissen**  
503       **JJ, van Baarle D, Fries E, Sanders EA, Minnema MC, van der Holt**  
504       **BR, Meijer E, Boelens JJ.** 2013. Human herpes virus 6 reactivation:  
505       important predictor for poor outcome after myeloablative, but not non-  
506       myeloablative allo-SCT. Bone marrow transplantation **48**:1460-1464.
- 507   11.   **Schonberger S, Meisel R, Adams O, Pufal Y, Laws HJ, Enczmann**  
508       **J, Dilloo D.** 2010. Prospective, comprehensive, and effective viral  
509       monitoring in children undergoing allogeneic hematopoietic stem cell  
510       transplantation. Biology of blood and marrow transplantation : journal of

- 511 the American Society for Blood and Marrow Transplantation **16**:1428-  
512 1435.
- 513 12. **Betts BC, Young JA, Ustun C, Cao Q, Weisdorf DJ.** 2011. Human  
514 herpesvirus 6 infection after hematopoietic cell transplantation: is  
515 routine surveillance necessary? *Biology of blood and marrow*  
516 *transplantation : journal of the American Society for Blood and Marrow*  
517 *Transplantation* **17**:1562-1568.
- 518 13. **Toriumi N, Kobayashi R, Yoshida M, Iguchi A, Sarashina T, Okubo**  
519 **H, Suzuki D, Sano H, Ogata M, Azuma H.** 2014. Risk factors for  
520 human herpesvirus 6 reactivation and its relationship with syndrome of  
521 inappropriate antidiuretic hormone secretion after stem cell  
522 transplantation in pediatric patients. *Journal of pediatric*  
523 *hematology/oncology* **36**:379-383.
- 524 14. **Mori Y, Miyamoto T, Nagafuji K, Kamezaki K, Yamamoto A, Saito**  
525 **N, Kato K, Takenaka K, Iwasaki H, Harada N, Abe Y, Teshima T,**  
526 **Akashi K.** 2010. High incidence of human herpes virus 6-associated  
527 encephalitis/myelitis following a second unrelated cord blood  
528 transplantation. *Biology of blood and marrow transplantation : journal of*  
529 *the American Society for Blood and Marrow Transplantation* **16**:1596-  
530 1602.
- 531 15. **Ogata M, Oshima K, Ikebe T, Takano K, Kanamori H, Kondo T,**  
532 **Ueda Y, Mori T, Hashimoto H, Ogawa H, Eto T, Ueki T, Miyamoto T,**  
533 **Ichinohe T, Atsuta Y, Fukuda T.** 2017. Clinical characteristics and  
534 outcome of human herpesvirus-6 encephalitis after allogeneic

- 535 hematopoietic stem cell transplantation. Bone marrow transplantation  
536 **52:1563-1570.**
- 537 16. **Ablashi D, Agut H, Alvarez-Lafuente R, Clark DA, Dewhurst S,**  
538 **DiLuca D, Flamand L, Frenkel N, Gallo R, Gompels UA, Hollenberg**  
539 **P, Jacobson S, Luppi M, Lusso P, Malnati M, Medveczky P, Mori Y,**  
540 **Pellett PE, Pritchett JC, Yamanishi K, Yoshikawa T.** 2014.  
541 Classification of HHV-6A and HHV-6B as distinct viruses. Arch Virol  
542 **159:863-870.**
- 543 17. **Tweedy J, Spyrou MA, Pearson M, Lassner D, Kuhl U, Gompels**  
544 **UA.** 2016. Complete Genome Sequence of Germline Chromosomally  
545 Integrated Human Herpesvirus 6A and Analyses Integration Sites  
546 Define a New Human Endogenous Virus with Potential to Reactivate  
547 as an Emerging Infection. *Viruses* **8.**
- 548 18. **Lou J, Wu Y, Cai M, Wu X, Shang S.** 2011. Subtype-specific, probe-  
549 based, real-time PCR for detection and typing of human herpesvirus-6  
550 encephalitis from pediatric patients under the age of 2 years. *Diagn*  
551 *Microbiol Infect Dis* **70:223-229.**
- 552 19. **Hall CB, Caserta MT, Schnabel K, Shelley LM, Marino AS,**  
553 **Carnahan JA, Yoo C, Lofthus GK, McDermott MP.** 2008.  
554 Chromosomal integration of human herpesvirus 6 is the major mode of  
555 congenital human herpesvirus 6 infection. *Pediatrics* **122:513-520.**
- 556 20. **Pellett PE, Ablashi DV, Ambros PF, Agut H, Caserta MT,**  
557 **Descamps V, Flamand L, Gautheret-Dejean A, Hall CB, Kamble RT,**  
558 **Kuehl U, Lassner D, Lautenschlager I, Loomis KS, Luppi M, Lusso**  
559 **P, Medveczky PG, Montoya JG, Mori Y, Ogata M, Pritchett JC,**



- 560           **Rogez S, Seto E, Ward KN, Yoshikawa T, Razonable RR.** 2012.  
561           Chromosomally integrated human herpesvirus 6: questions and  
562           answers. *Rev Med Virol* **22**:144-155.
- 563   21.   **Fridholm H, Ostergaard Sorensen L, Rosenstjerne MW, Nielsen H,**  
564           **Sellebjerg F, Bengard Andersen A, Fomsgaard A.** 2016. Human  
565           pegivirus detected in a patient with severe encephalitis using a  
566           metagenomic pan-virus array. *J Clin Virol* **77**:5-8.
- 567   22.   **Graf EH, Simmon KE, Tardif KD, Hymas W, Flygare S, Eilbeck K,**  
568           **Yandell M, Schlaberg R.** 2016. Unbiased Detection of Respiratory  
569           Viruses by Use of RNA Sequencing-Based Metagenomics: a  
570           Systematic Comparison to a Commercial PCR Panel. *J Clin Microbiol*  
571           **54**:1000-1007.
- 572   23.   **Lecuit M, Eloit M.** 2015. The potential of whole genome NGS for  
573           infectious disease diagnosis. *Expert Rev Mol Diagn* **15**:1517-1519.
- 574   24.   **Lewandowska DW, Zagordi O, Zbinden A, Schuurmans MM,**  
575           **Schreiber P, Geissberger FD, Huder JB, Boni J, Benden C, Mueller**  
576           **NJ, Trkola A, Huber M.** 2015. Unbiased metagenomic sequencing  
577           complements specific routine diagnostic methods and increases  
578           chances to detect rare viral strains. *Diagn Microbiol Infect Dis* **83**:133-  
579           138.
- 580   25.   **Mulcahy-O'Grady H, Workentine ML.** 2016. The Challenge and  
581           Potential of Metagenomics in the Clinic. *Front Immunol* **7**:29.
- 582   26.   **Bukowska-Osko I, Perlejewski K, Nakamura S, Motooka D,**  
583           **Stokowy T, Kosinska J, Popiel M, Ploski R, Horban A, Lipowski D,**  
584           **Caraballo Cortes K, Pawelczyk A, Demkow U, Stepien A,**

- 585           **Radkowski M, Laskus T.** 2017. Sensitivity of Next-Generation  
586           Sequencing Metagenomic Analysis for Detection of RNA and DNA  
587           Viruses in Cerebrospinal Fluid: The Confounding Effect of Background  
588           Contamination. *Adv Exp Med Biol* **944**:53-62.
- 589   27.   **Collot S, Petit B, Bordessoule D, Alain S, Touati M, Denis F,**  
590           **Ranger-Rogez S.** 2002. Real-time PCR for quantification of human  
591           herpesvirus 6 DNA from lymph nodes and saliva. *J Clin Microbiol*  
592           **40**:2445-2451.
- 593   28.   **VanDevanter DR, Warrenner P, Bennett L, Schultz ER, Coulter S,**  
594           **Garber RL, Rose TM.** 1996. Detection and analysis of diverse  
595           herpesviral species by consensus primer PCR. *J Clin Microbiol*  
596           **34**:1666-1671.
- 597   29.   **Simmonds P.** 2012. SSE: a nucleotide and amino acid sequence  
598           analysis platform. *BMC Res Notes* **5**:50.
- 599   30.   **Sharp C, Golubchik T, Gregory WF, McNaughton AL, Gow N,**  
600           **Selvaratnam M, Mirea A, Foster D, Andersson M, Klenerman P,**  
601           **Jeffery K, Matthews PC.** 2018. Oxford Screening CSF and  
602           Respiratory samples ('OSCAR'): results of a pilot study to screen  
603           clinical samples from a diagnostic microbiology laboratory for viruses  
604           using Illumina next generation sequencing. *BMC Res Notes* **11**:120.
- 605   31.   **Colombier MA, Amorim S, Salmona M, Thieblemont C, Legoff J,**  
606           **Lafaurie M.** 2017. HHV-6 reactivation as a cause of fever in  
607           autologous hematopoietic stem cell transplant recipients. *J Infect*  
608           **75**:155-159.

- 609 32. **Ljungman P, de la Camara R, Cordonnier C, Einsele H, Engelhard**  
610 **D, Reusser P, Styczynski J, Ward K, European Conference on**  
611 **Infections in L.** 2008. Management of CMV, HHV-6, HHV-7 and  
612 Kaposi-sarcoma herpesvirus (HHV-8) infections in patients with  
613 hematological malignancies and after SCT. Bone marrow  
614 transplantation **42:227-240.**
- 615 33. **Lu J, Breitwieser FP, Thielen P, Salzberg SL.** 2017. Bracken:  
616 estimating species abundance in metagenomics data. PeerJ Comput.  
617 Sci. **3:e104; DOI 10.7717/peerj-cs.104.**
- 618 34. **McNaughton A, Golubchik T, Sharp C, Gregory WF, Selvaratnam**  
619 **M, Mirea A, Klenerman P, Jeffery K, Matthews PC.** 2017. Oxford  
620 screening of CSF and Respiratory Samples ('OSCAR'): comparison of  
621 routine laboratory diagnostics, multiplex PCR and next generation  
622 sequencing for identification of viruses from clinical samples.  
623 F1000Research 2017, 6:2130 (poster) (doi:  
624 10.7490/f1000research.1115150.1).
- 625 35. **Ondov BD, Bergman NH, Phillippy AM.** 2011. Interactive  
626 metagenomic visualization in a Web browser. BMC Bioinformatics  
627 **12:385.**  
628

**A**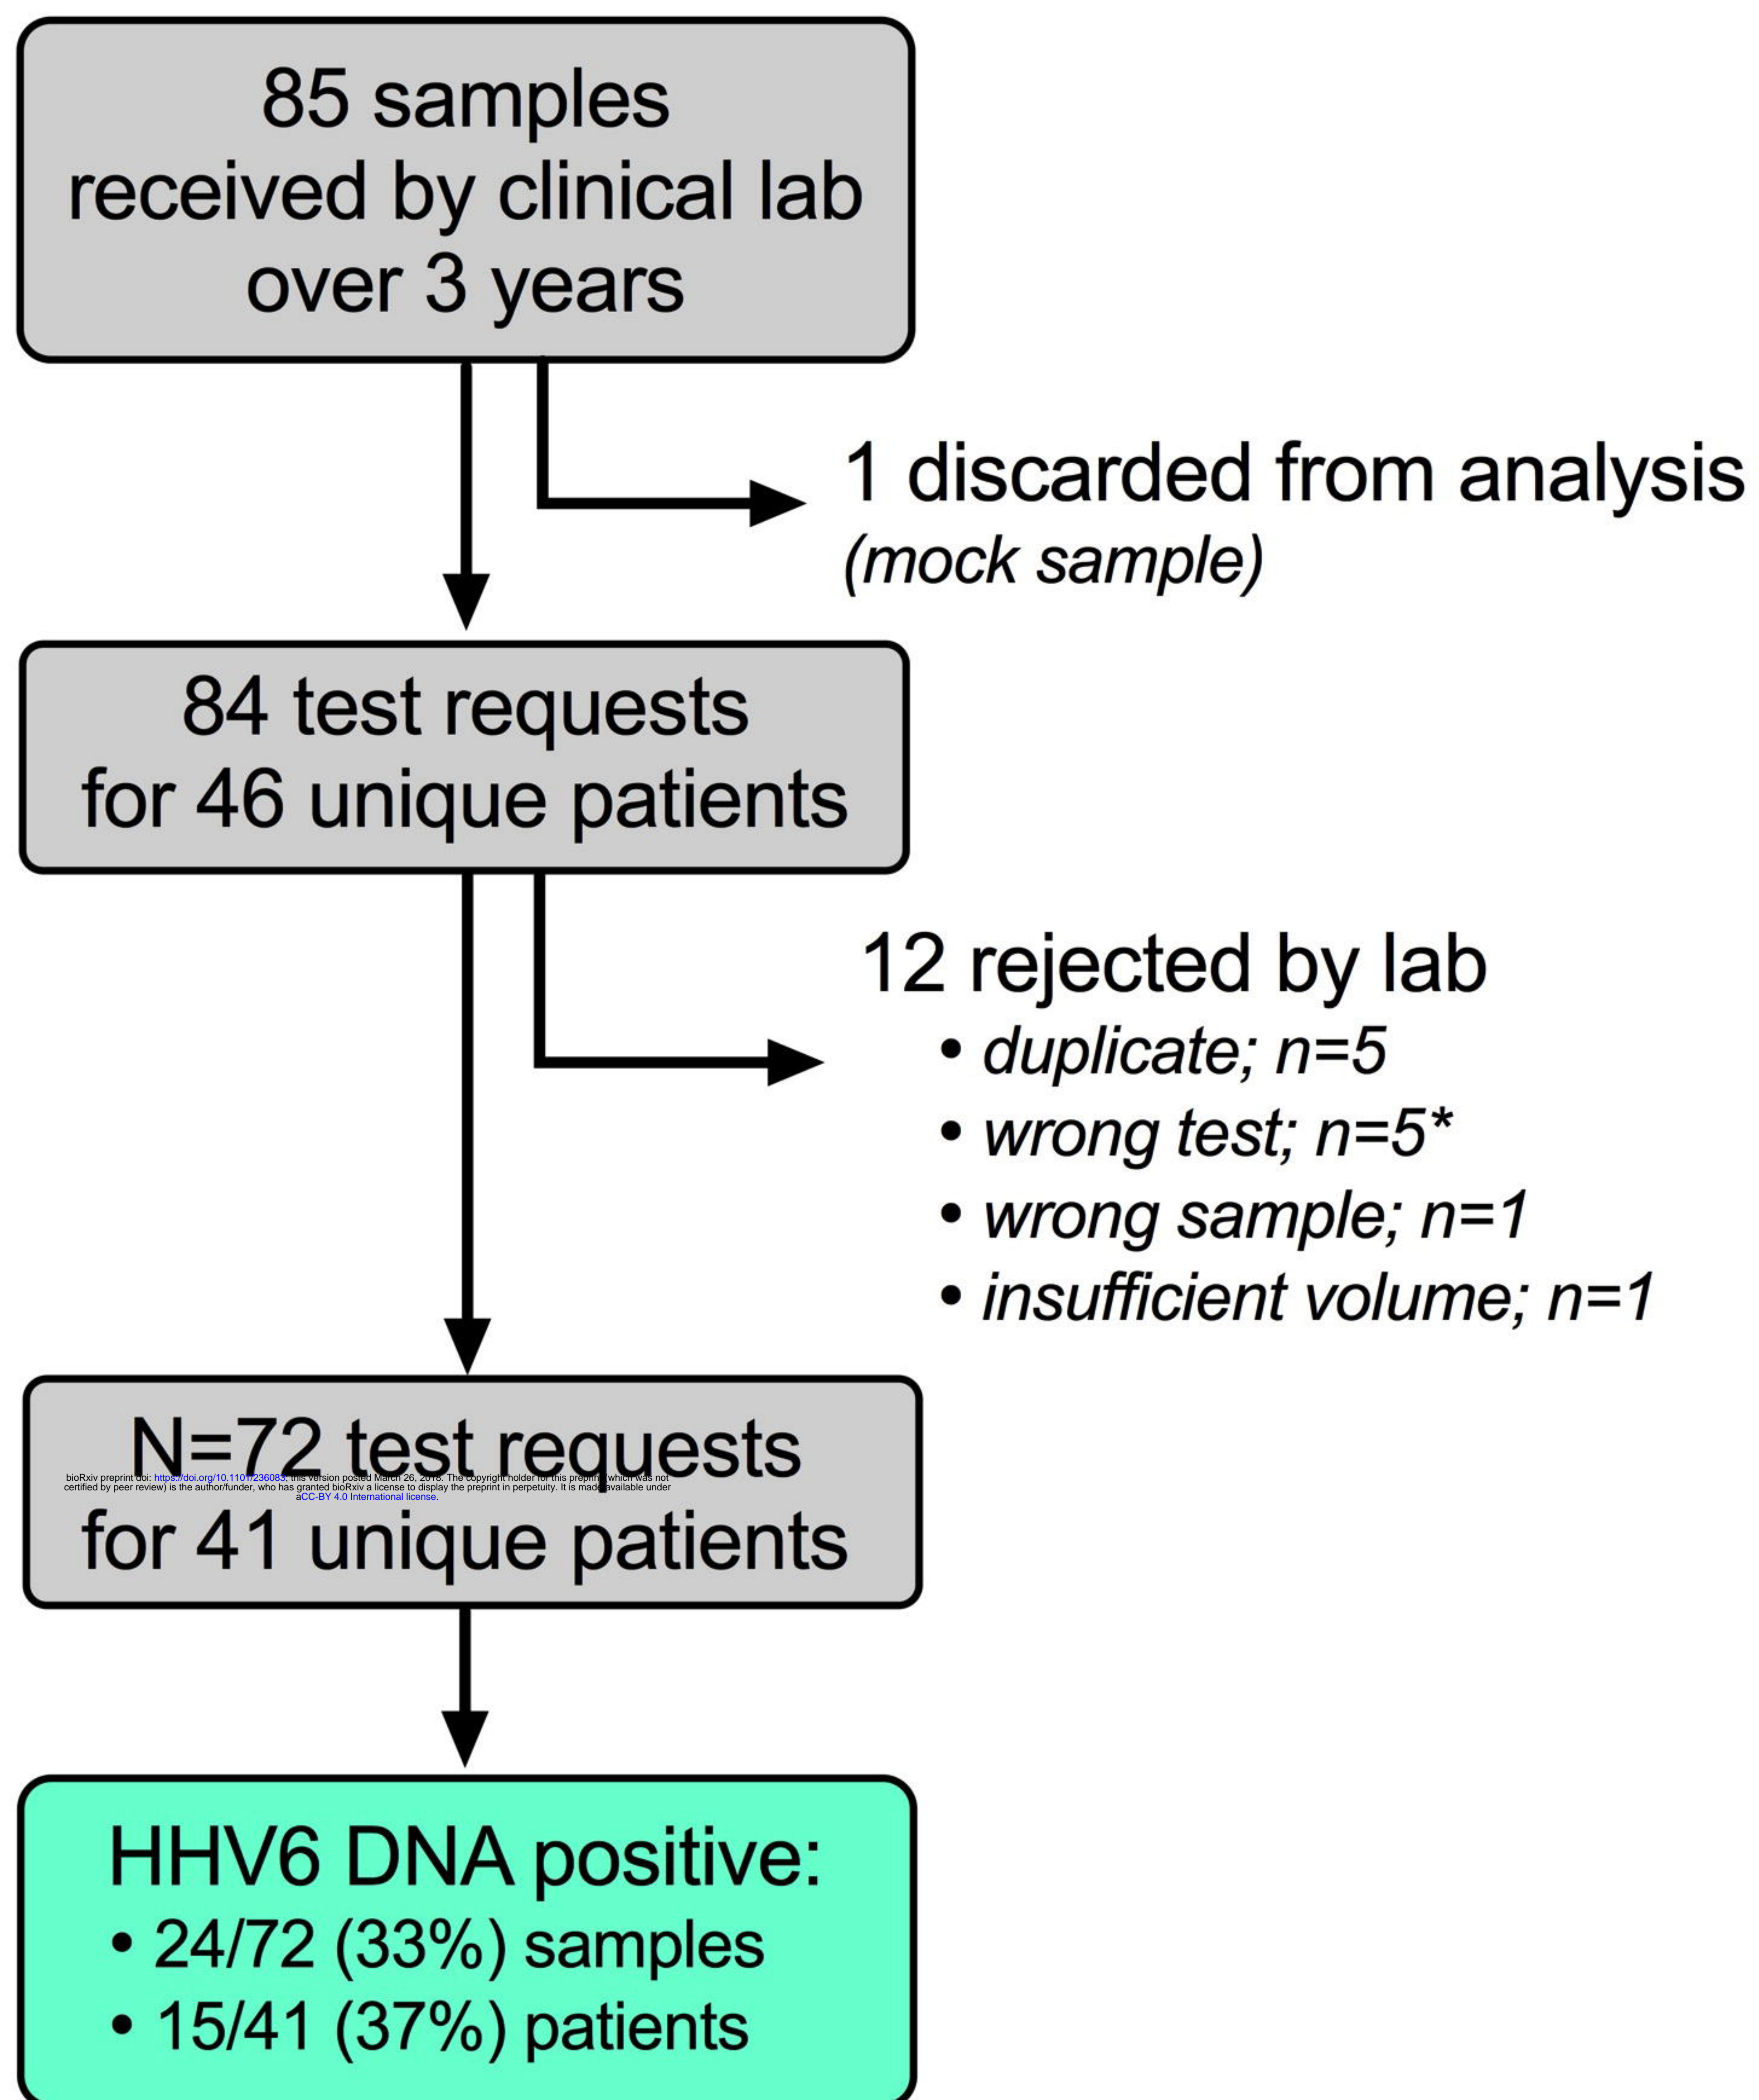**B**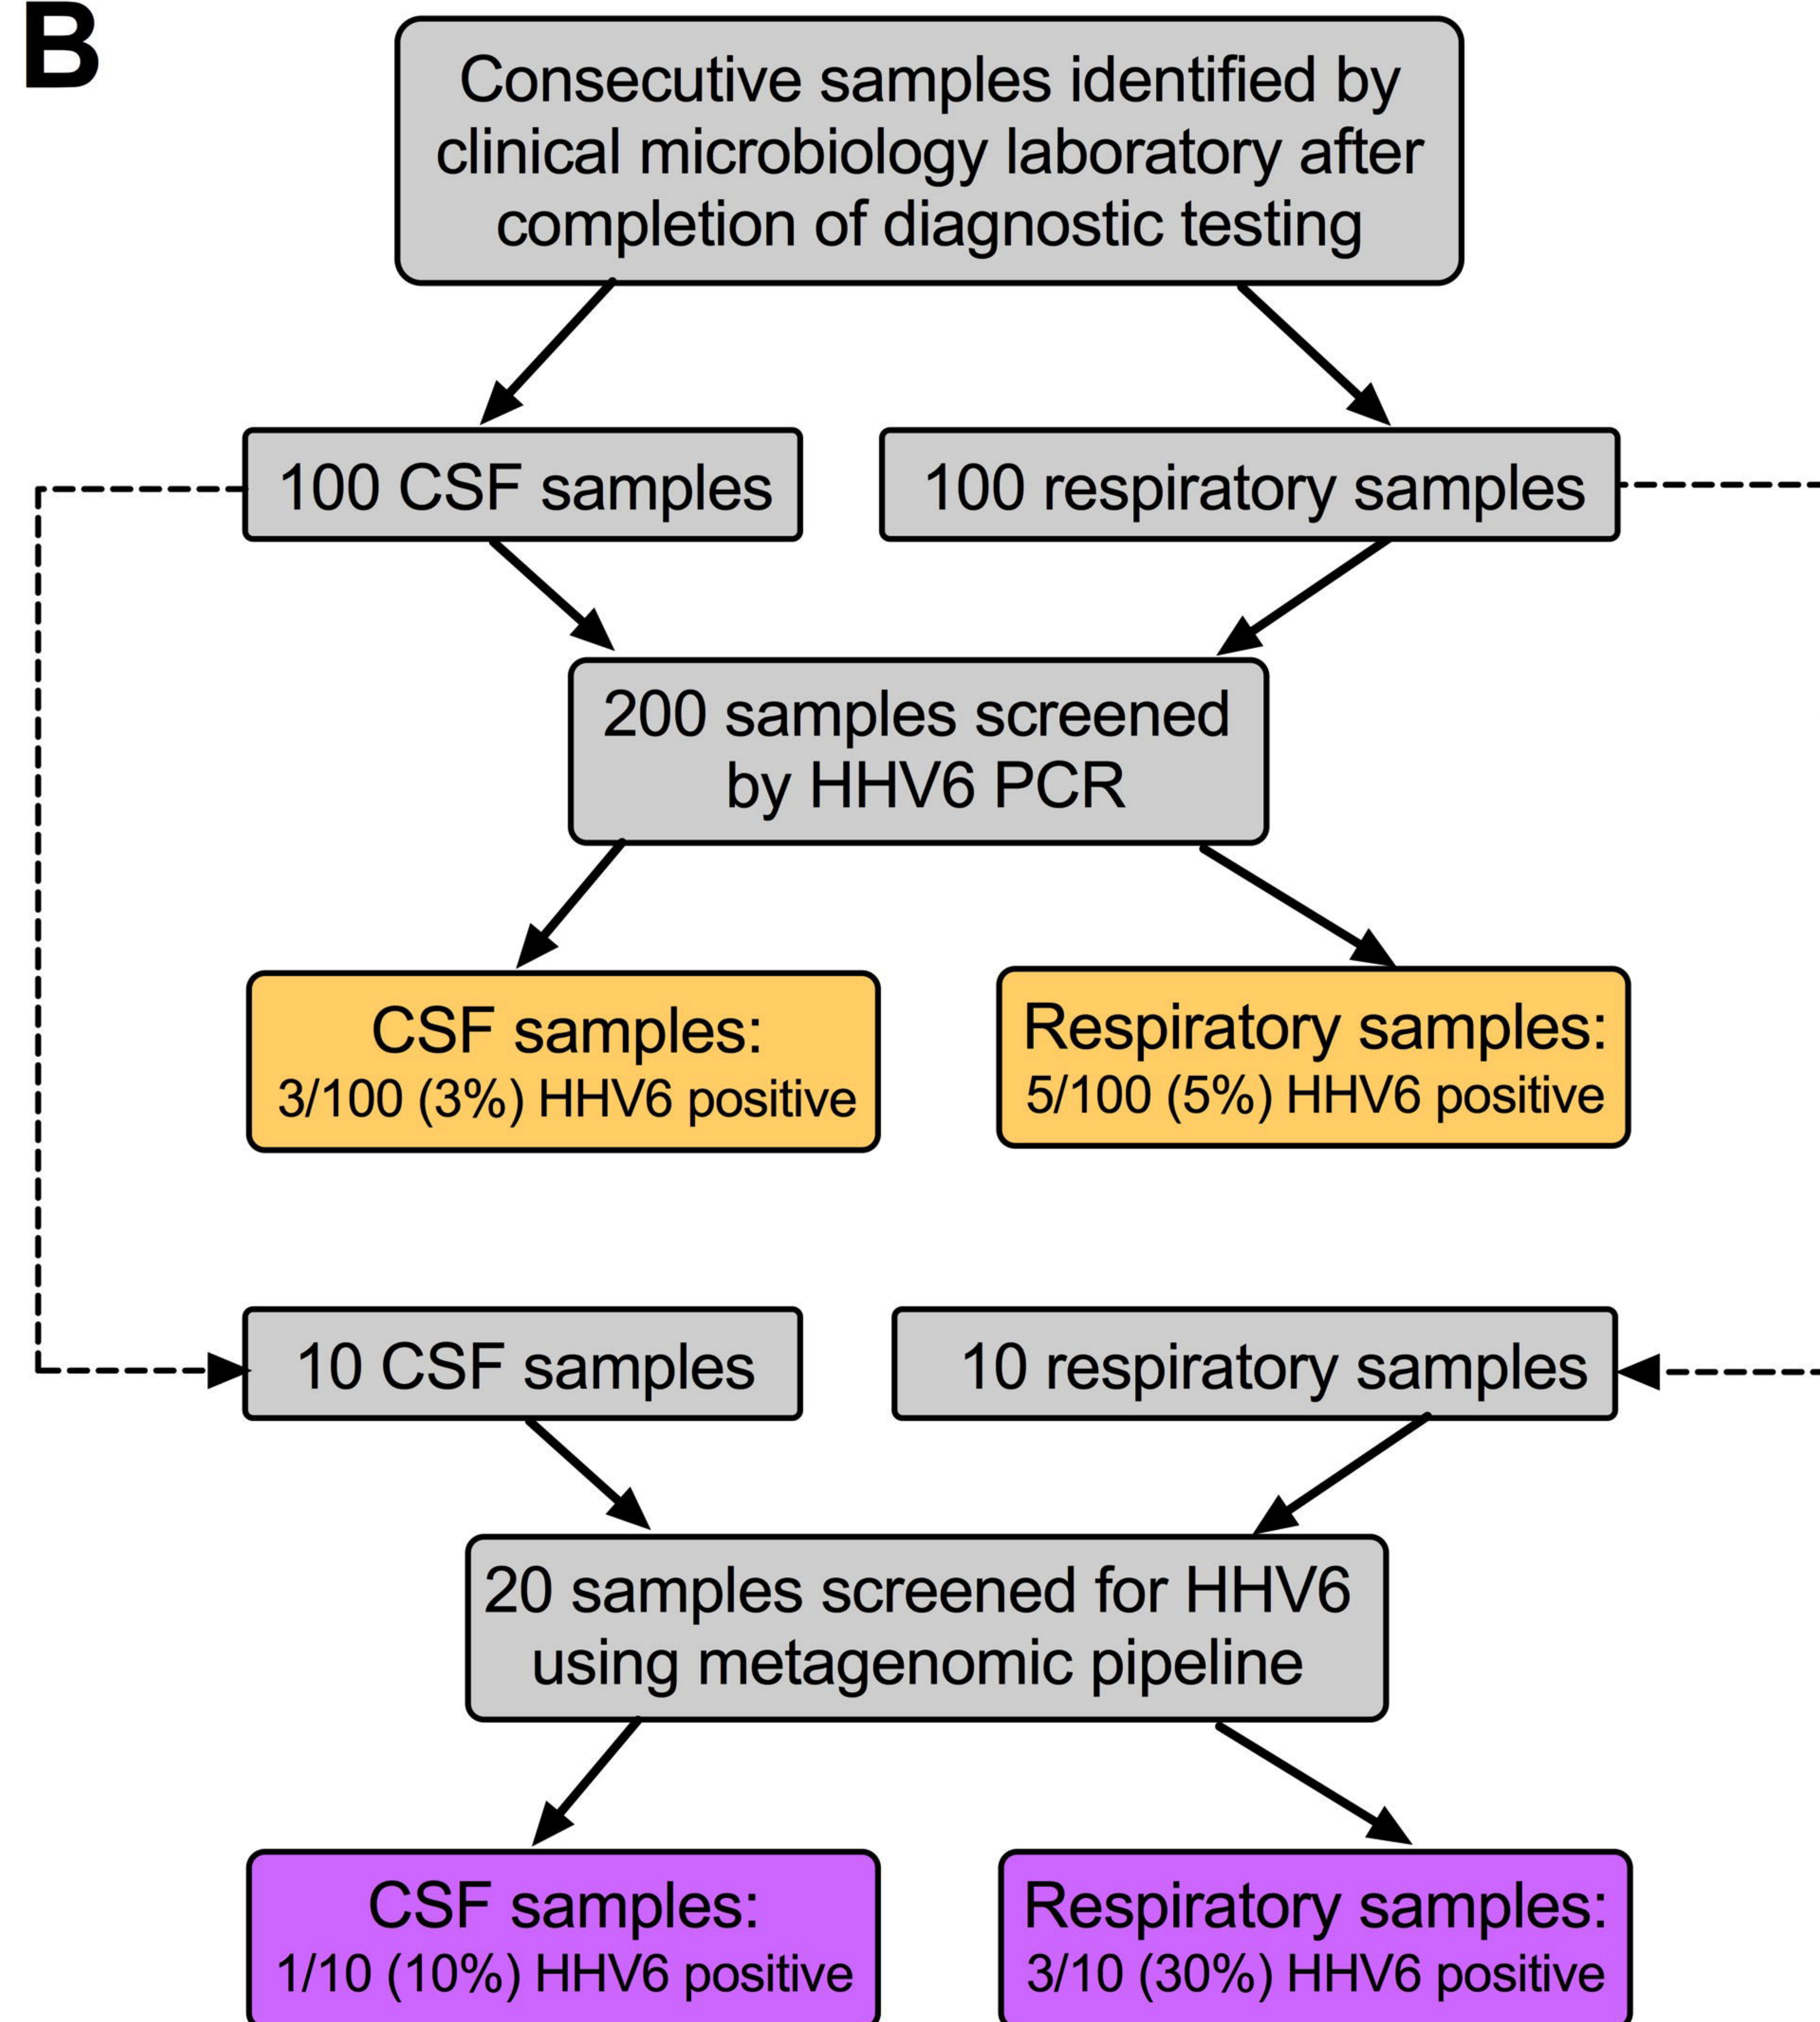

**A**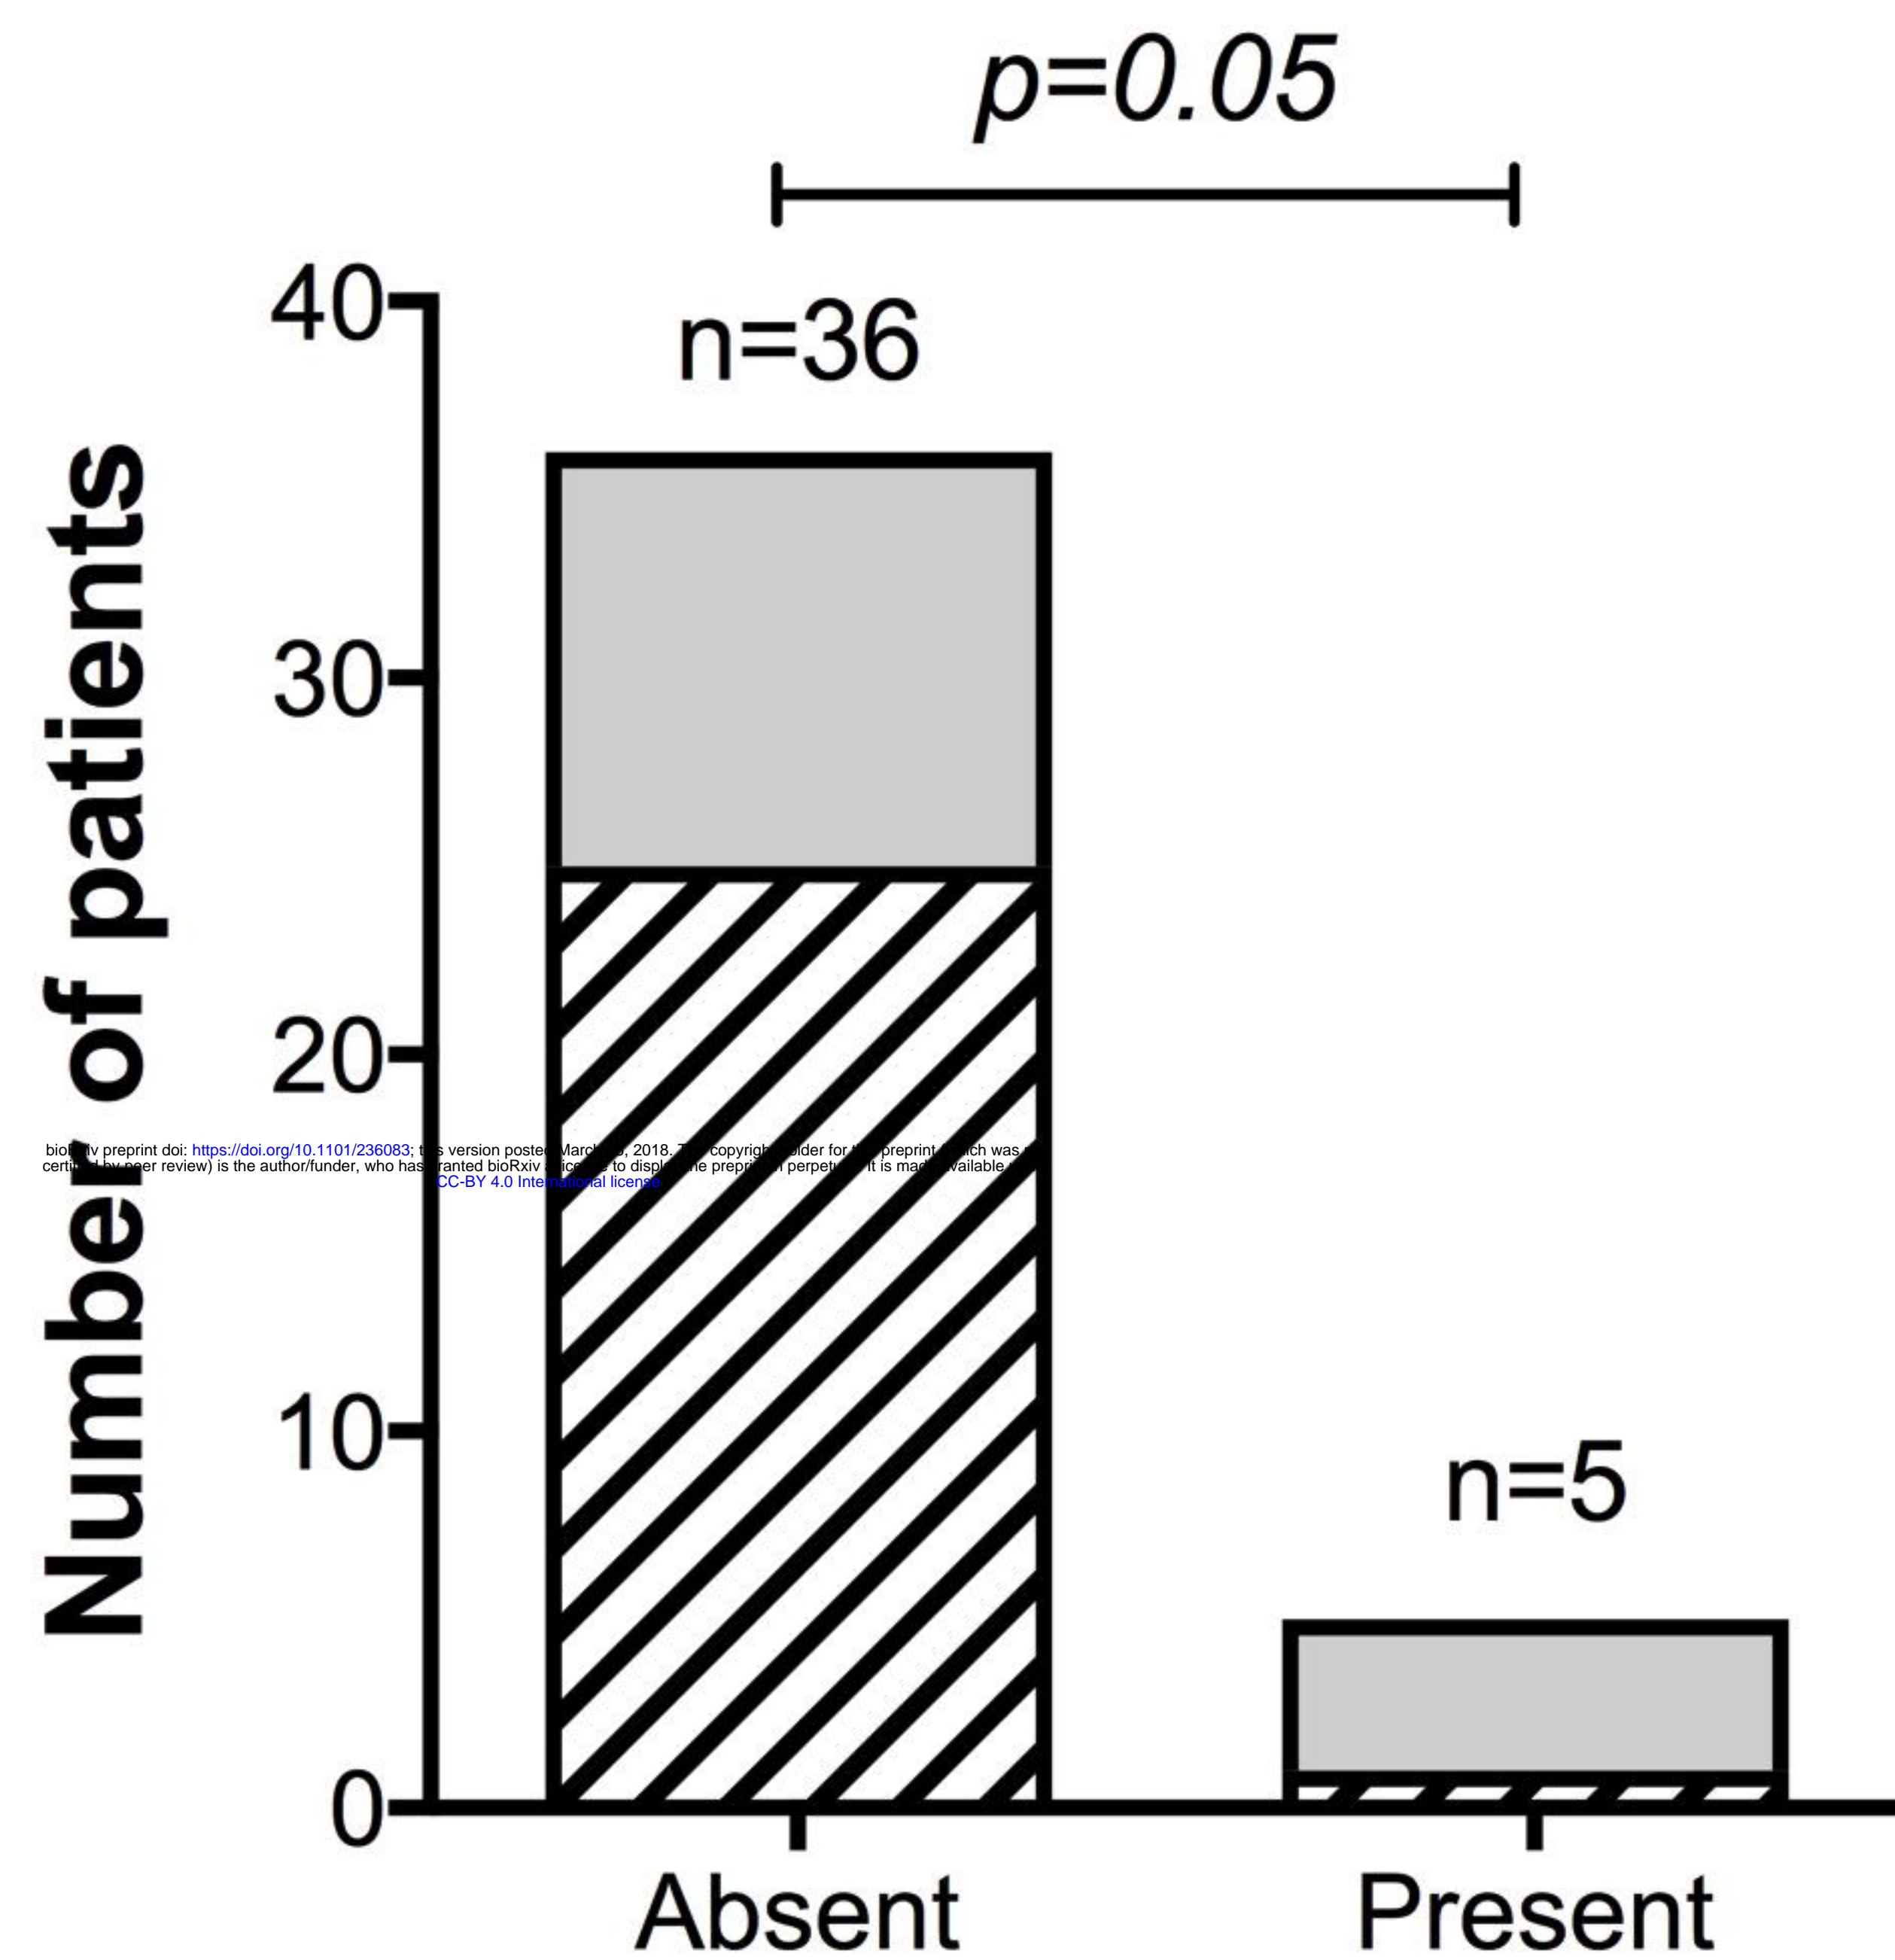**Graft vs Host Disease**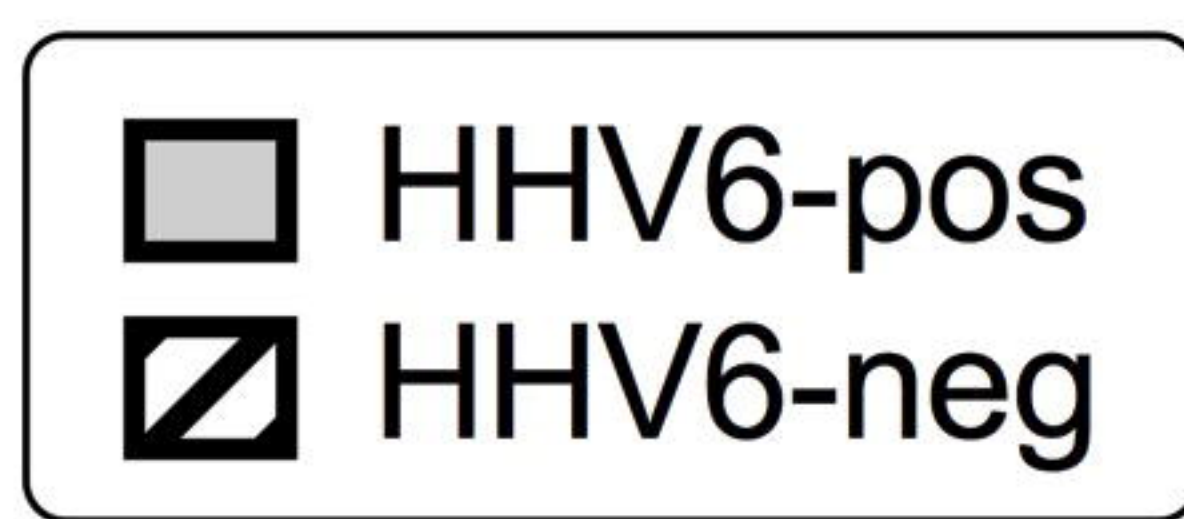**B**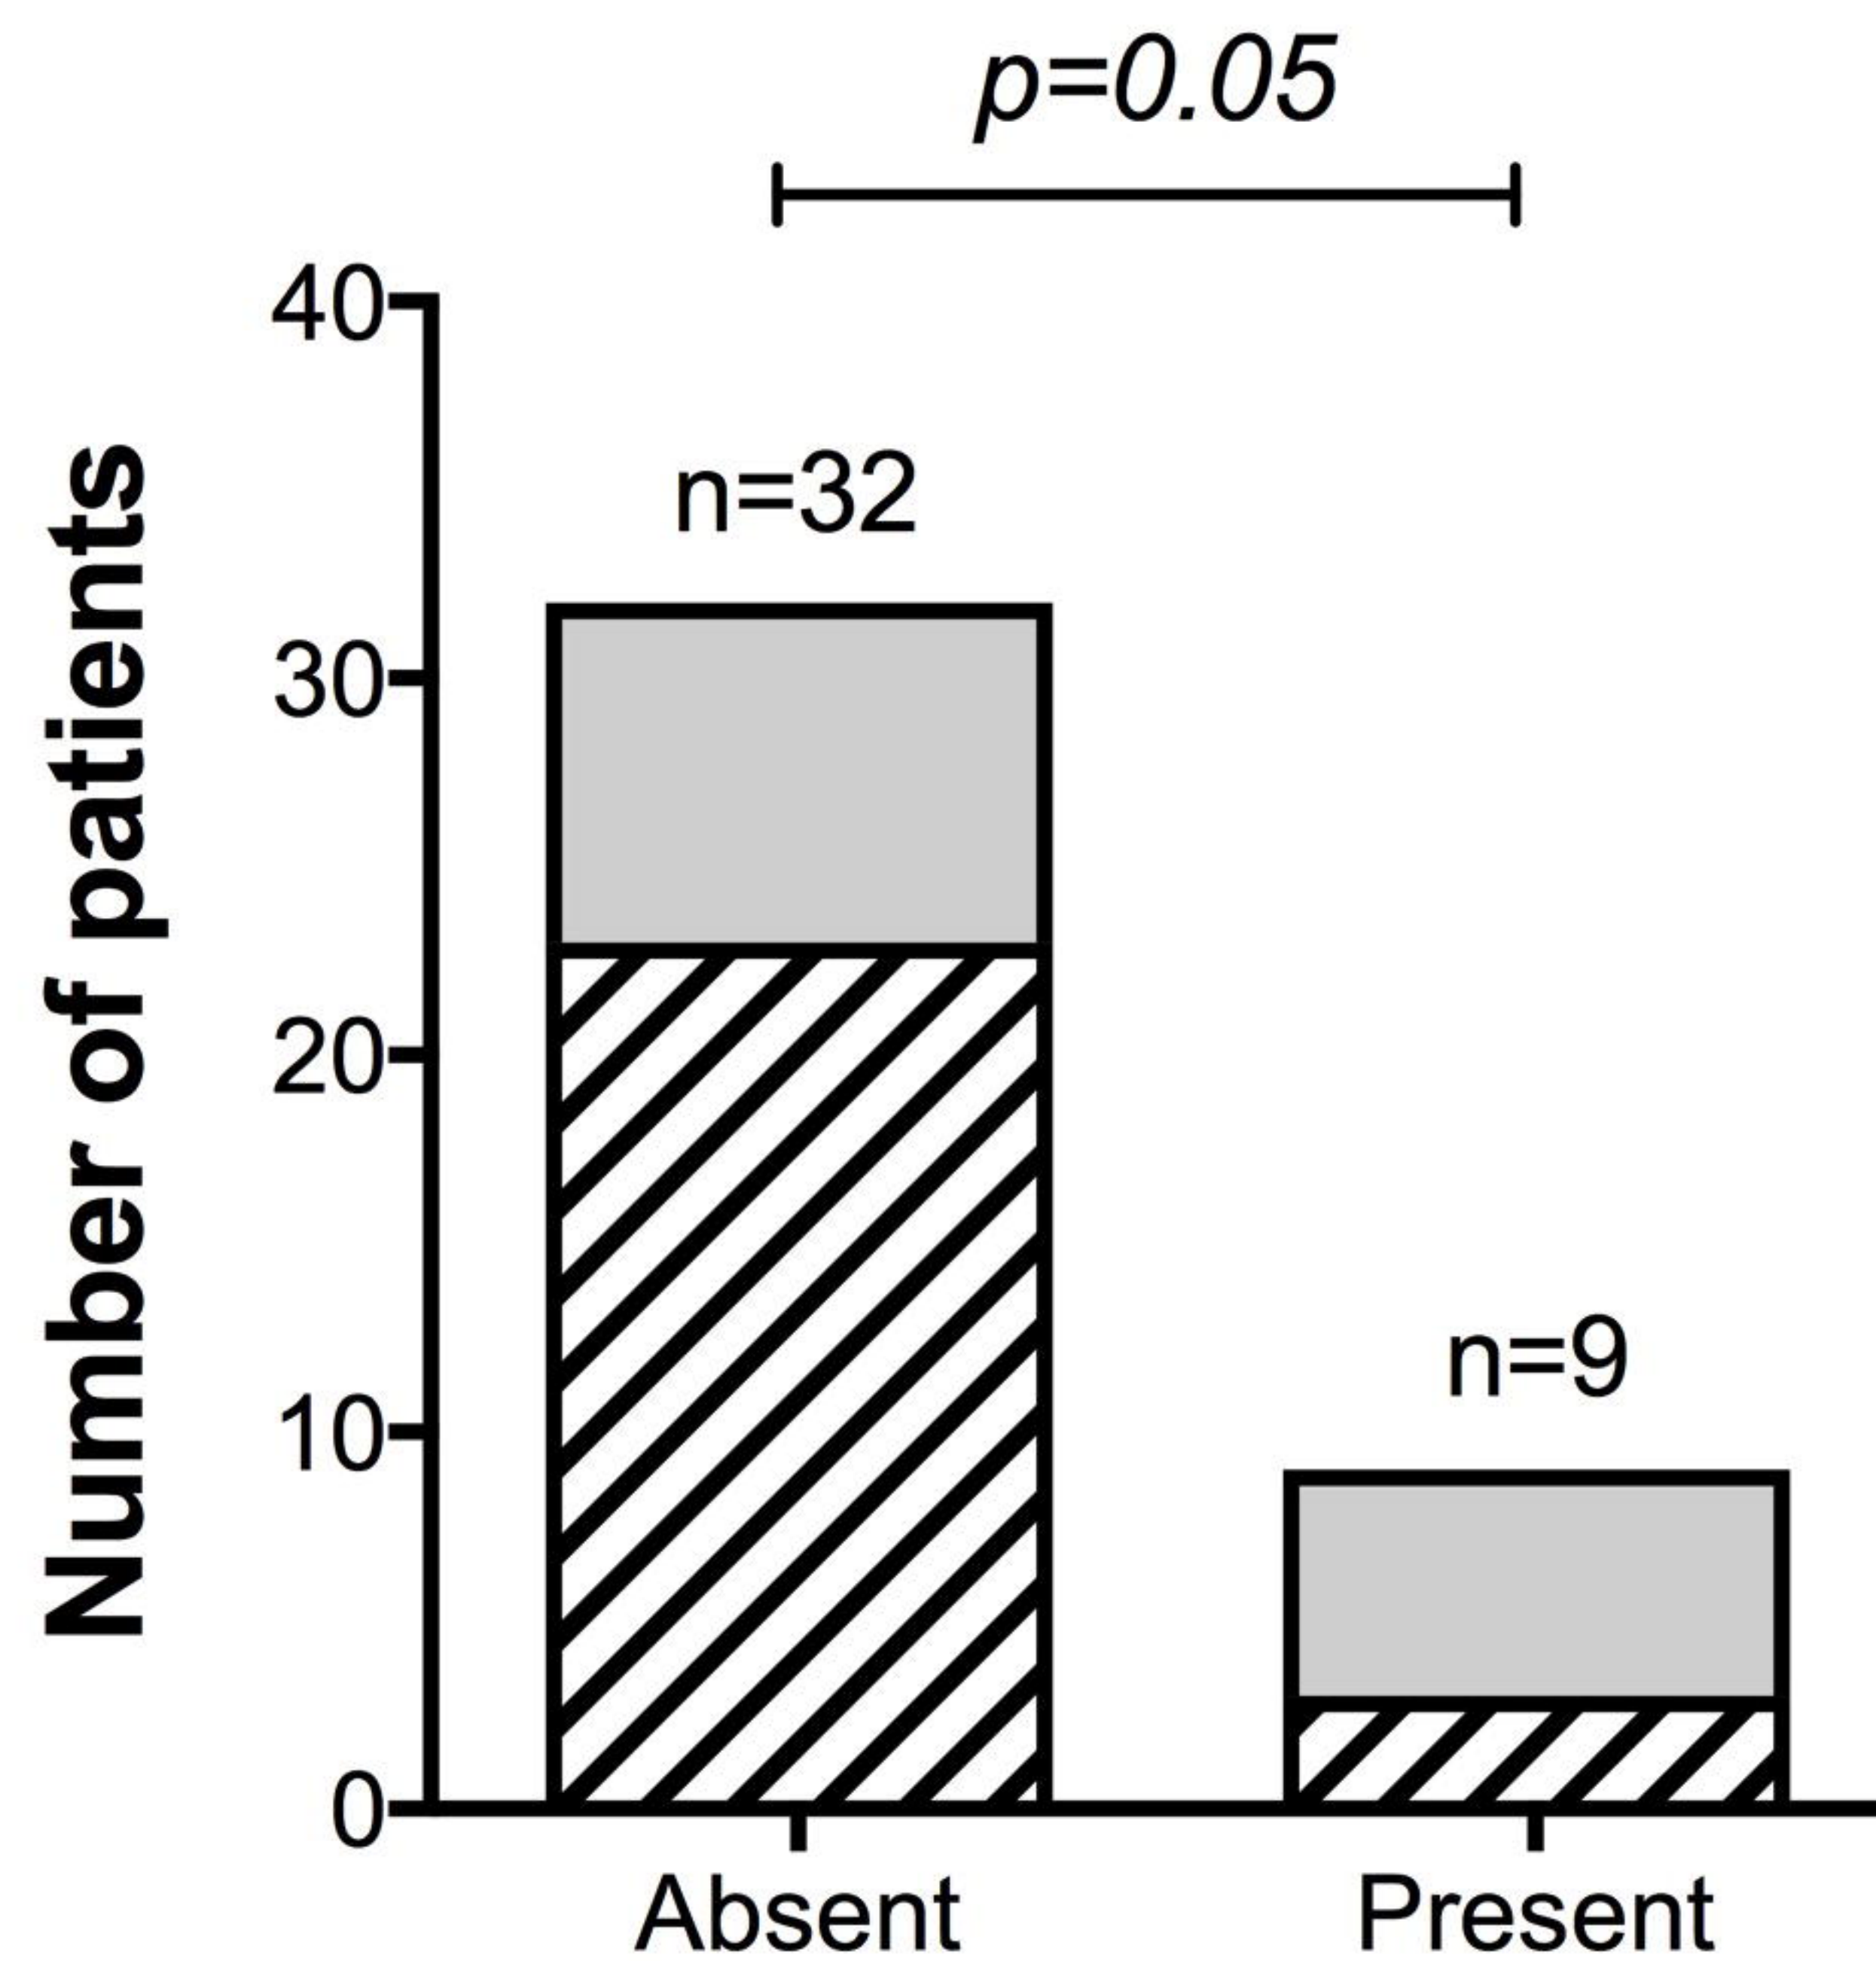**CNS Disease**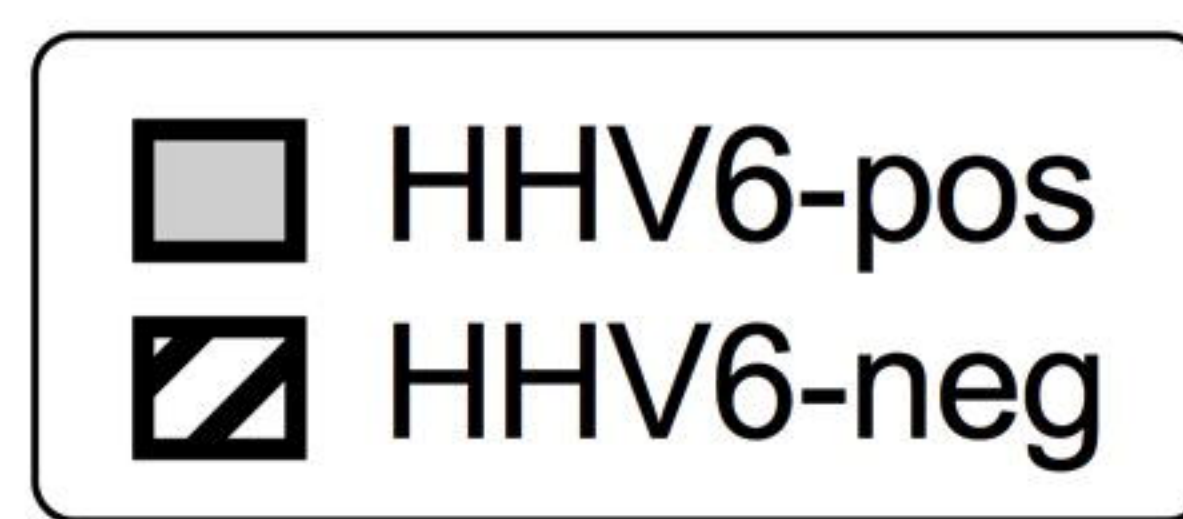**C**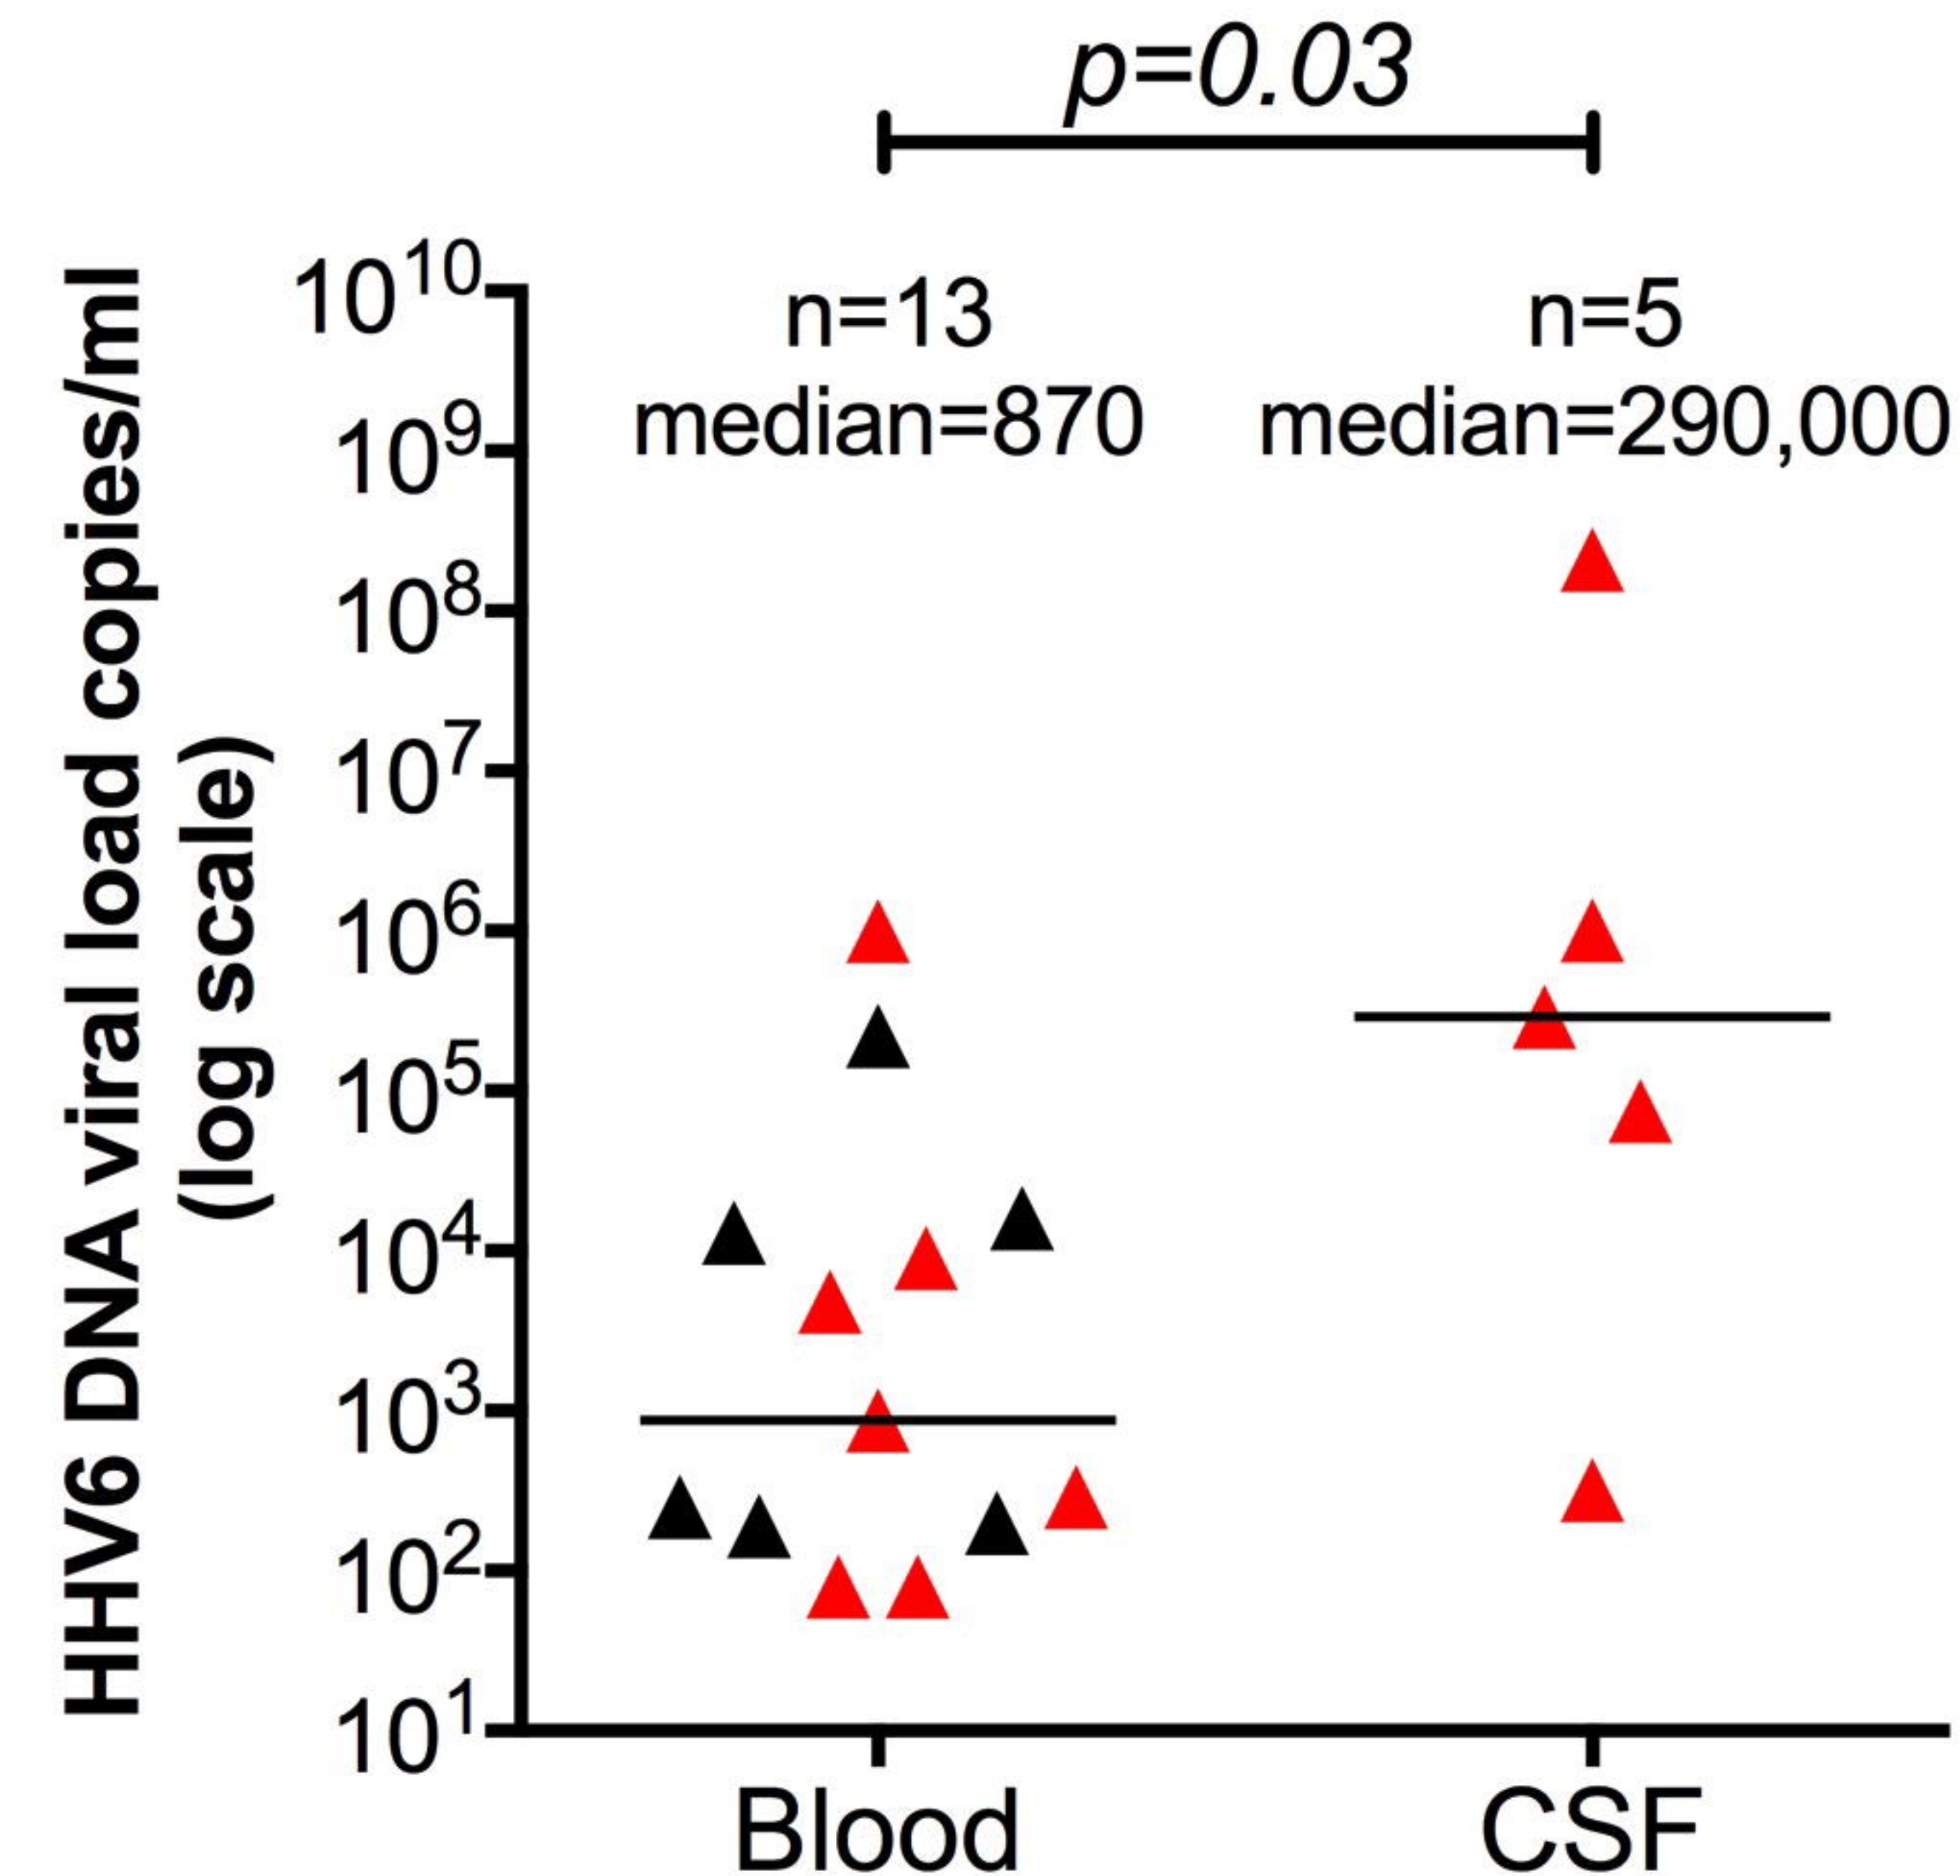**Sample type**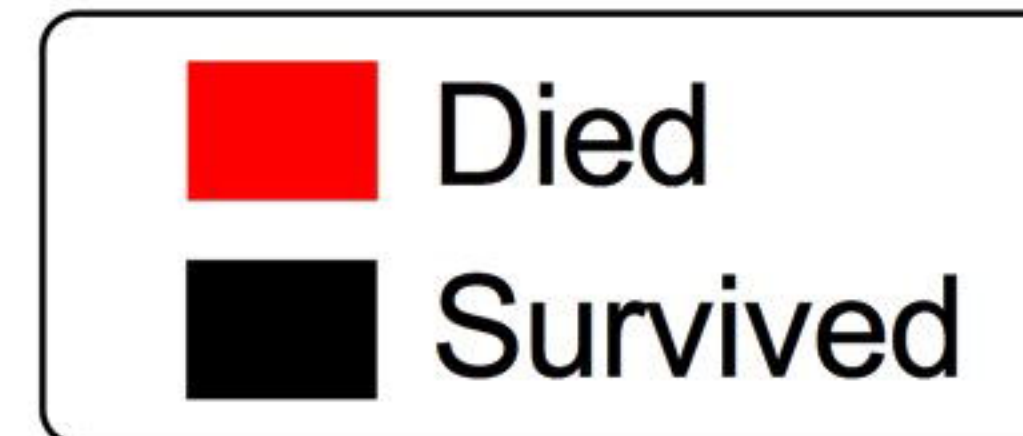

**A**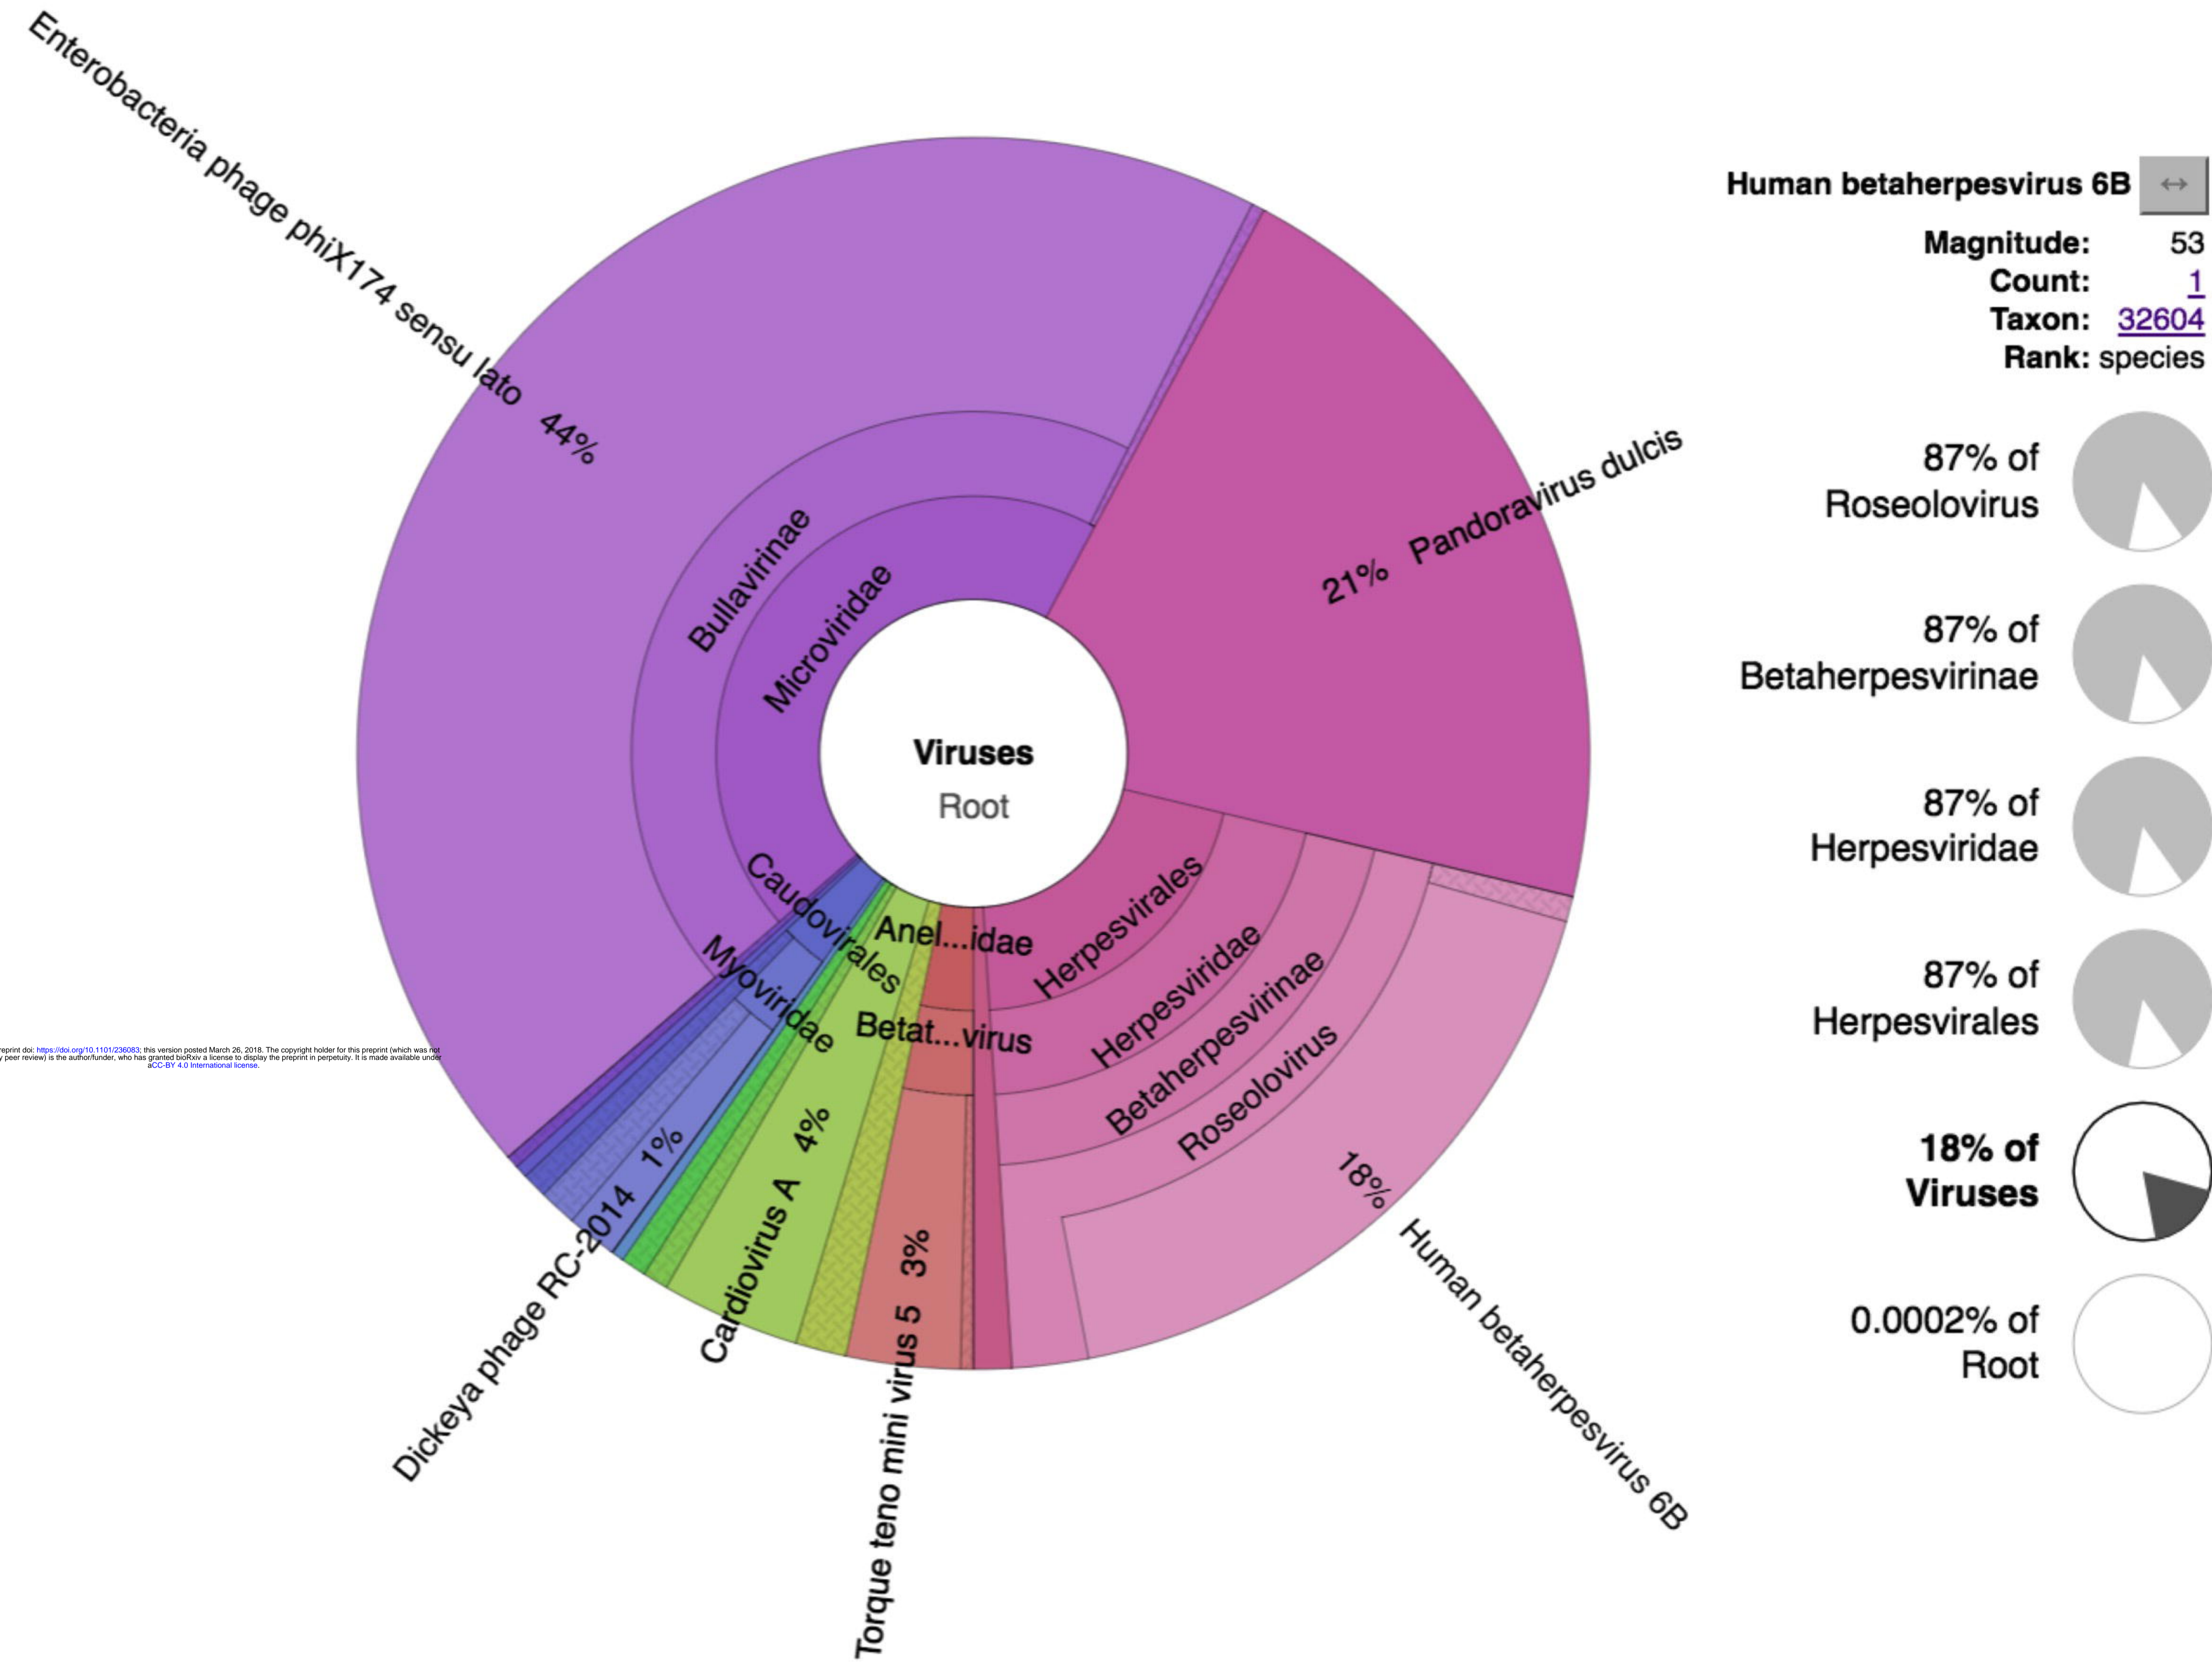**B**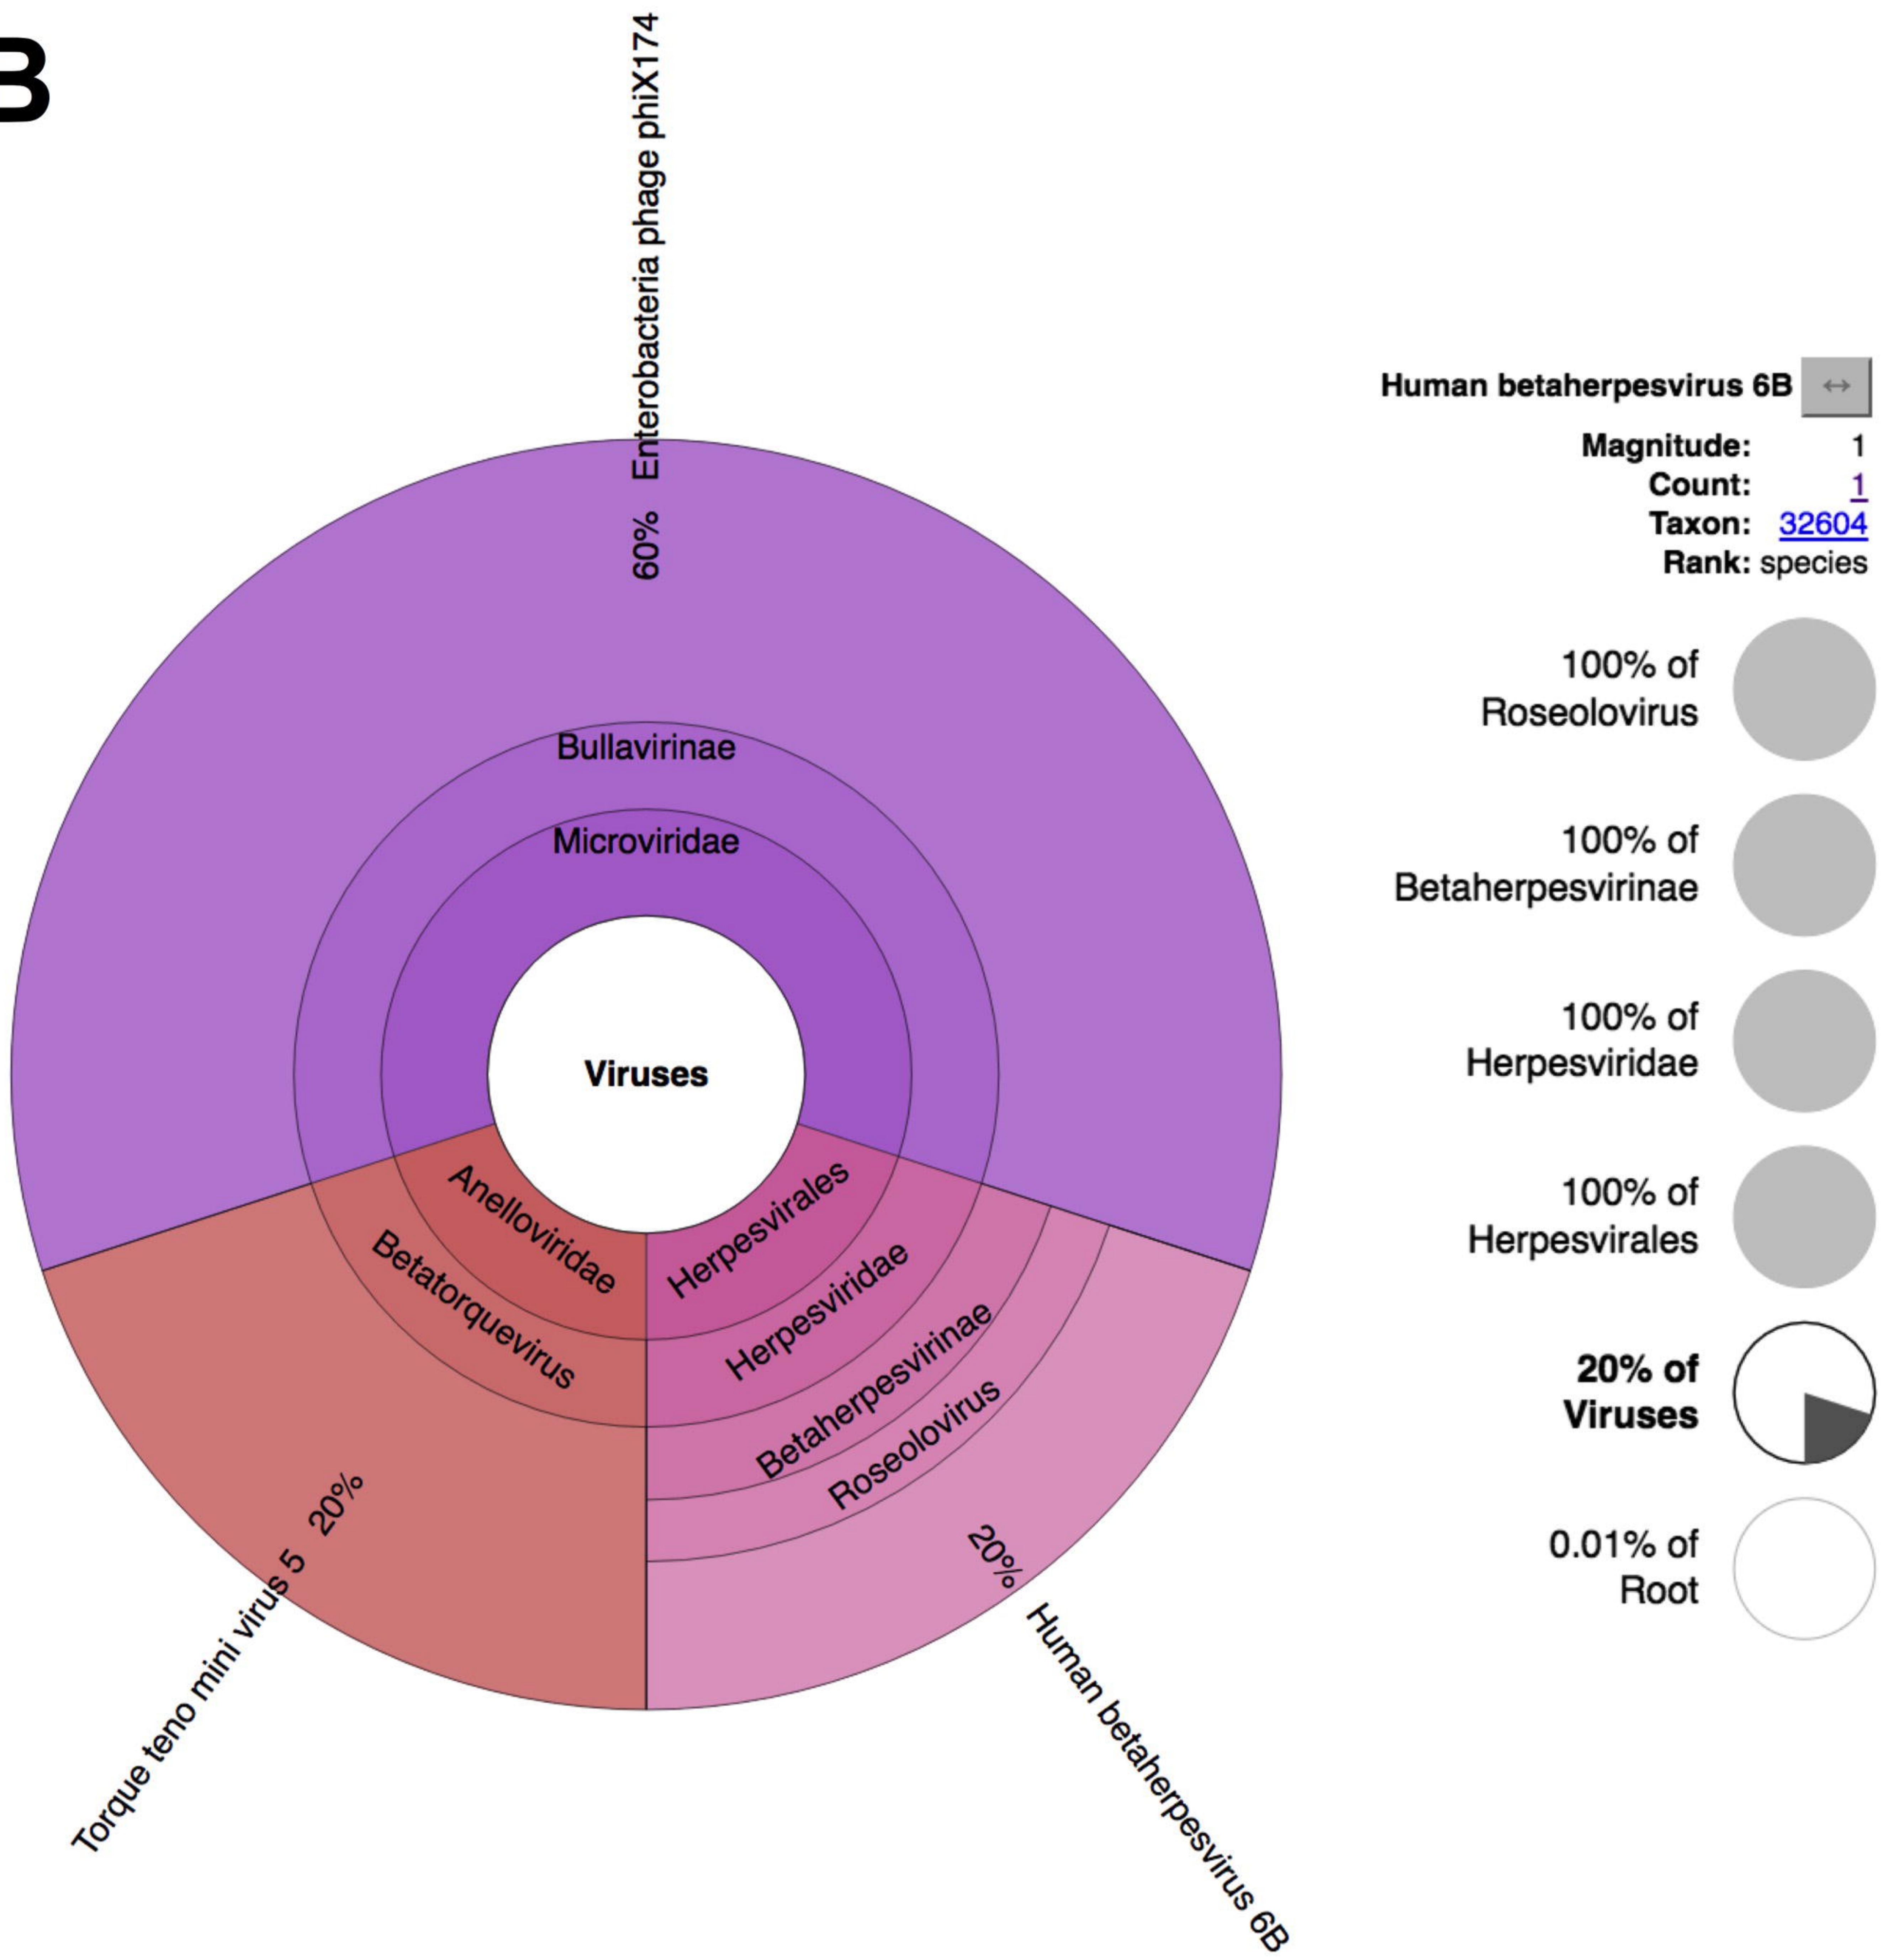

**A**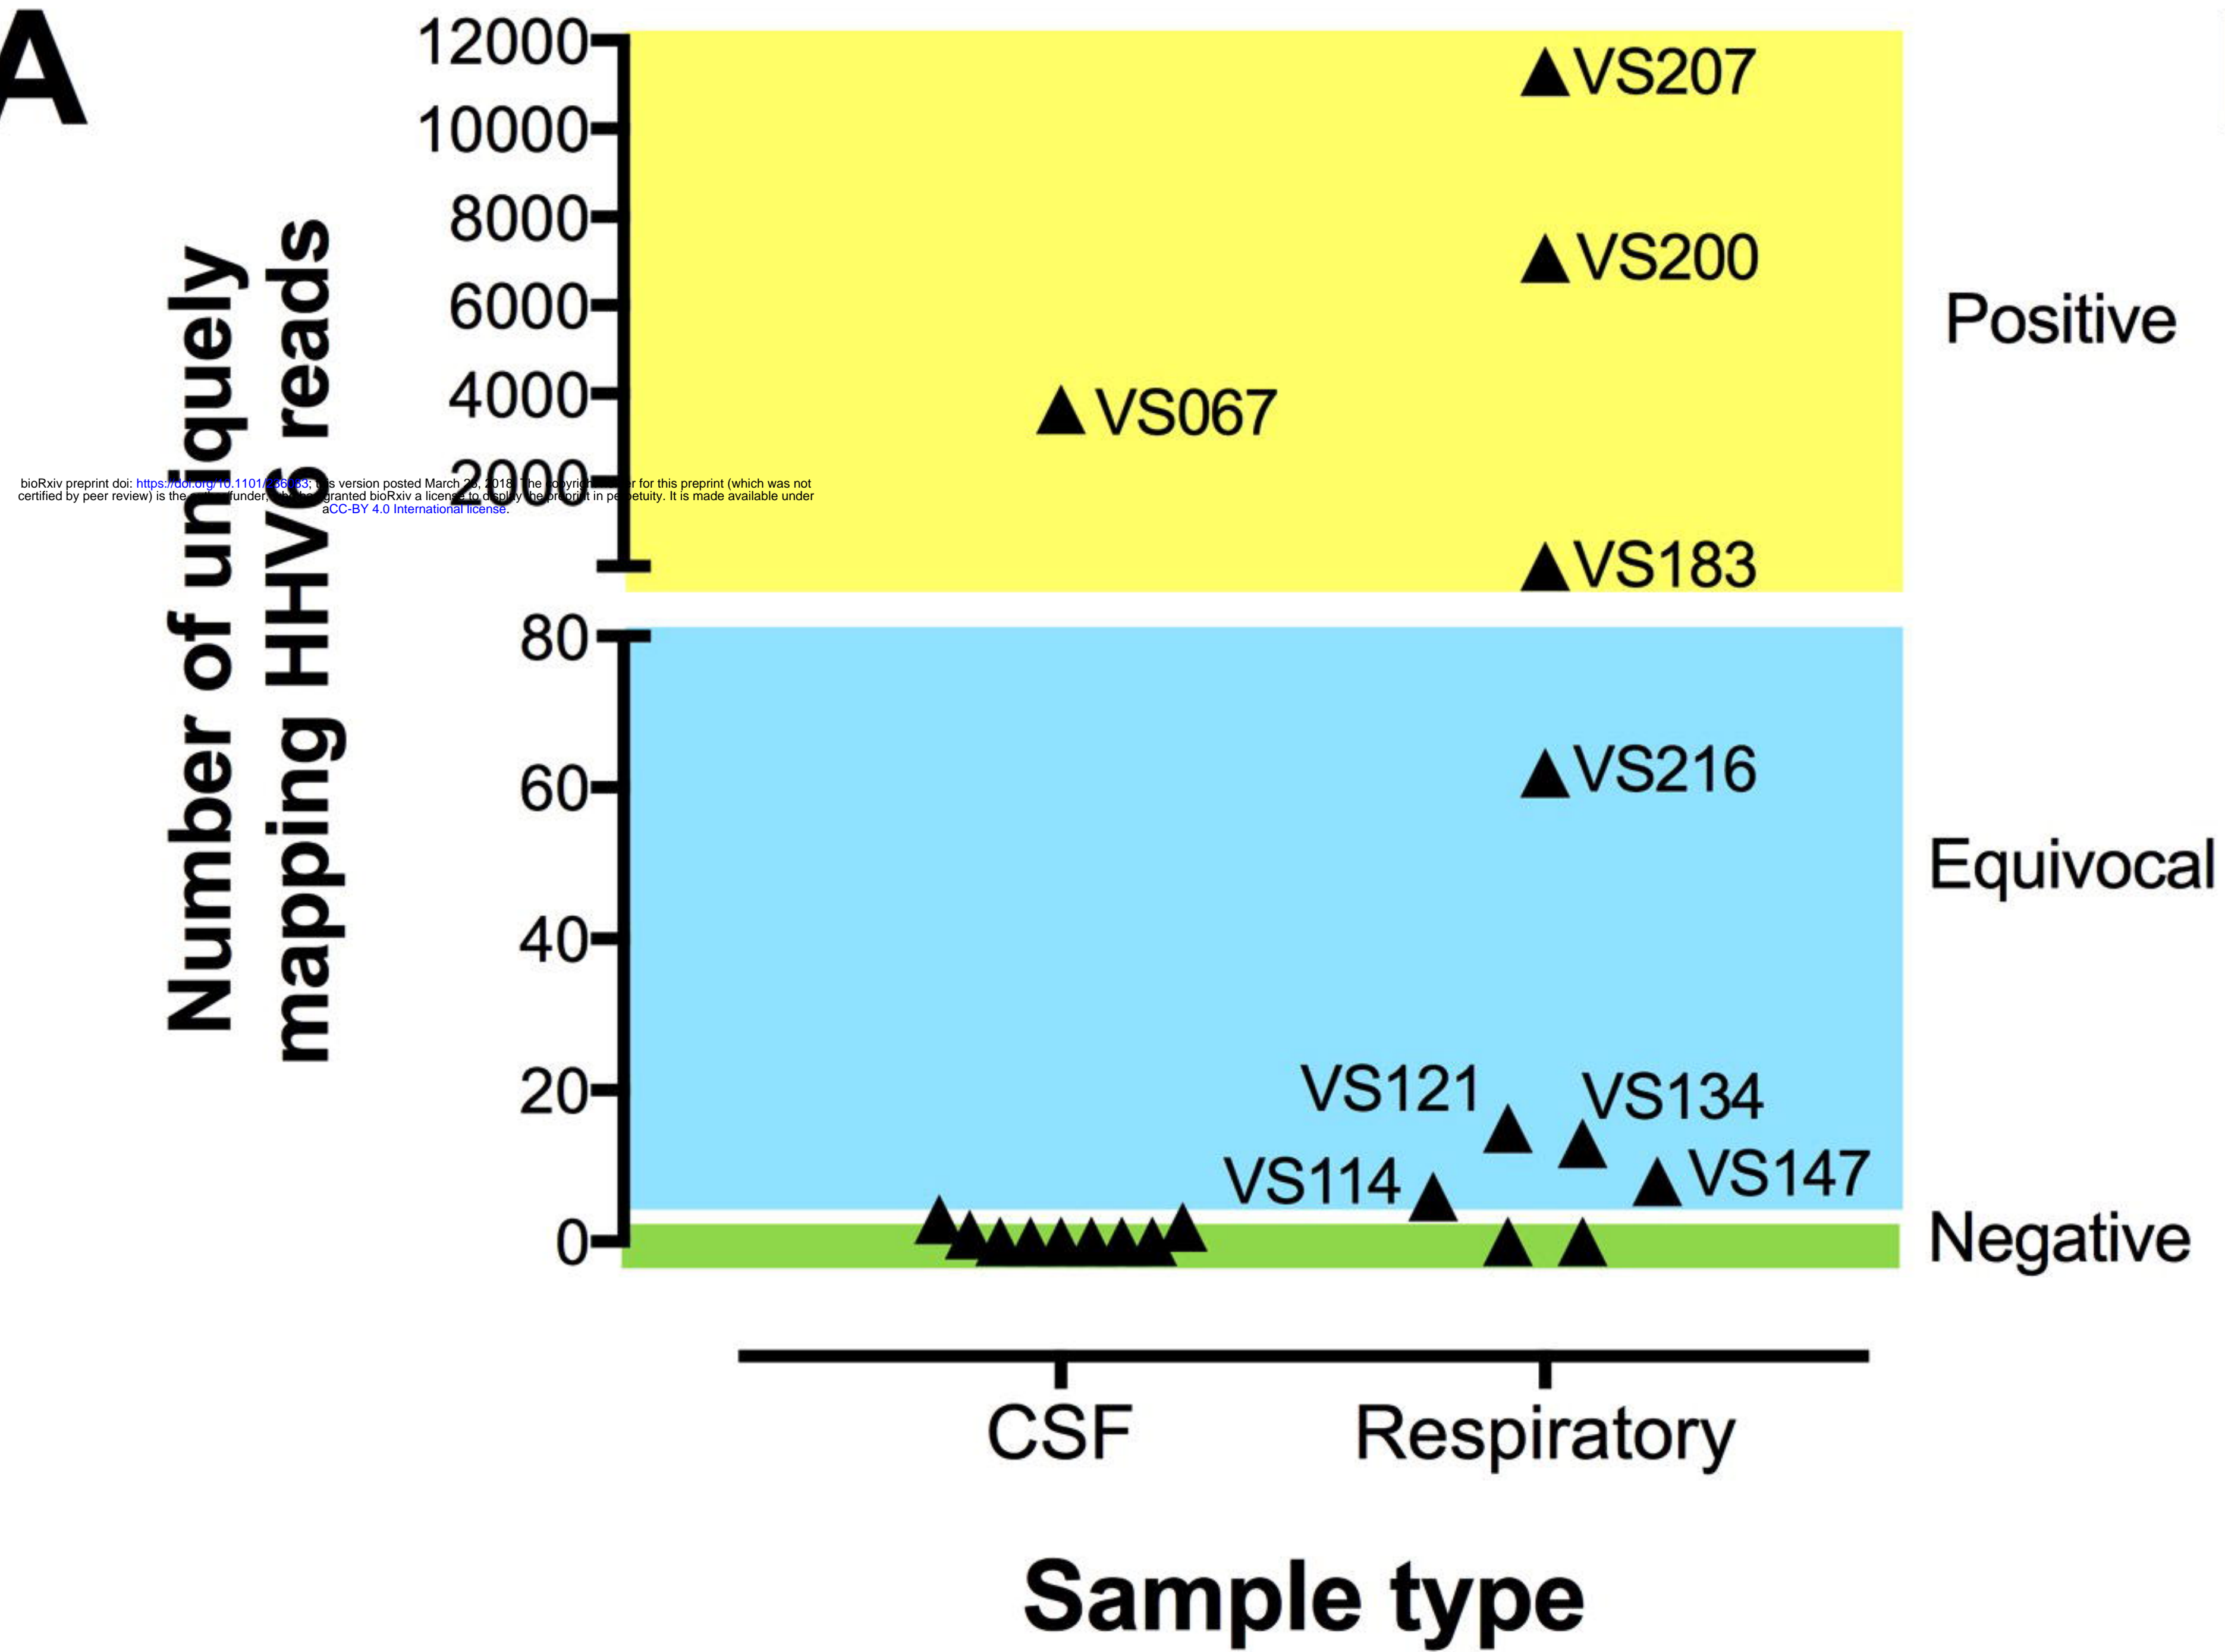**B**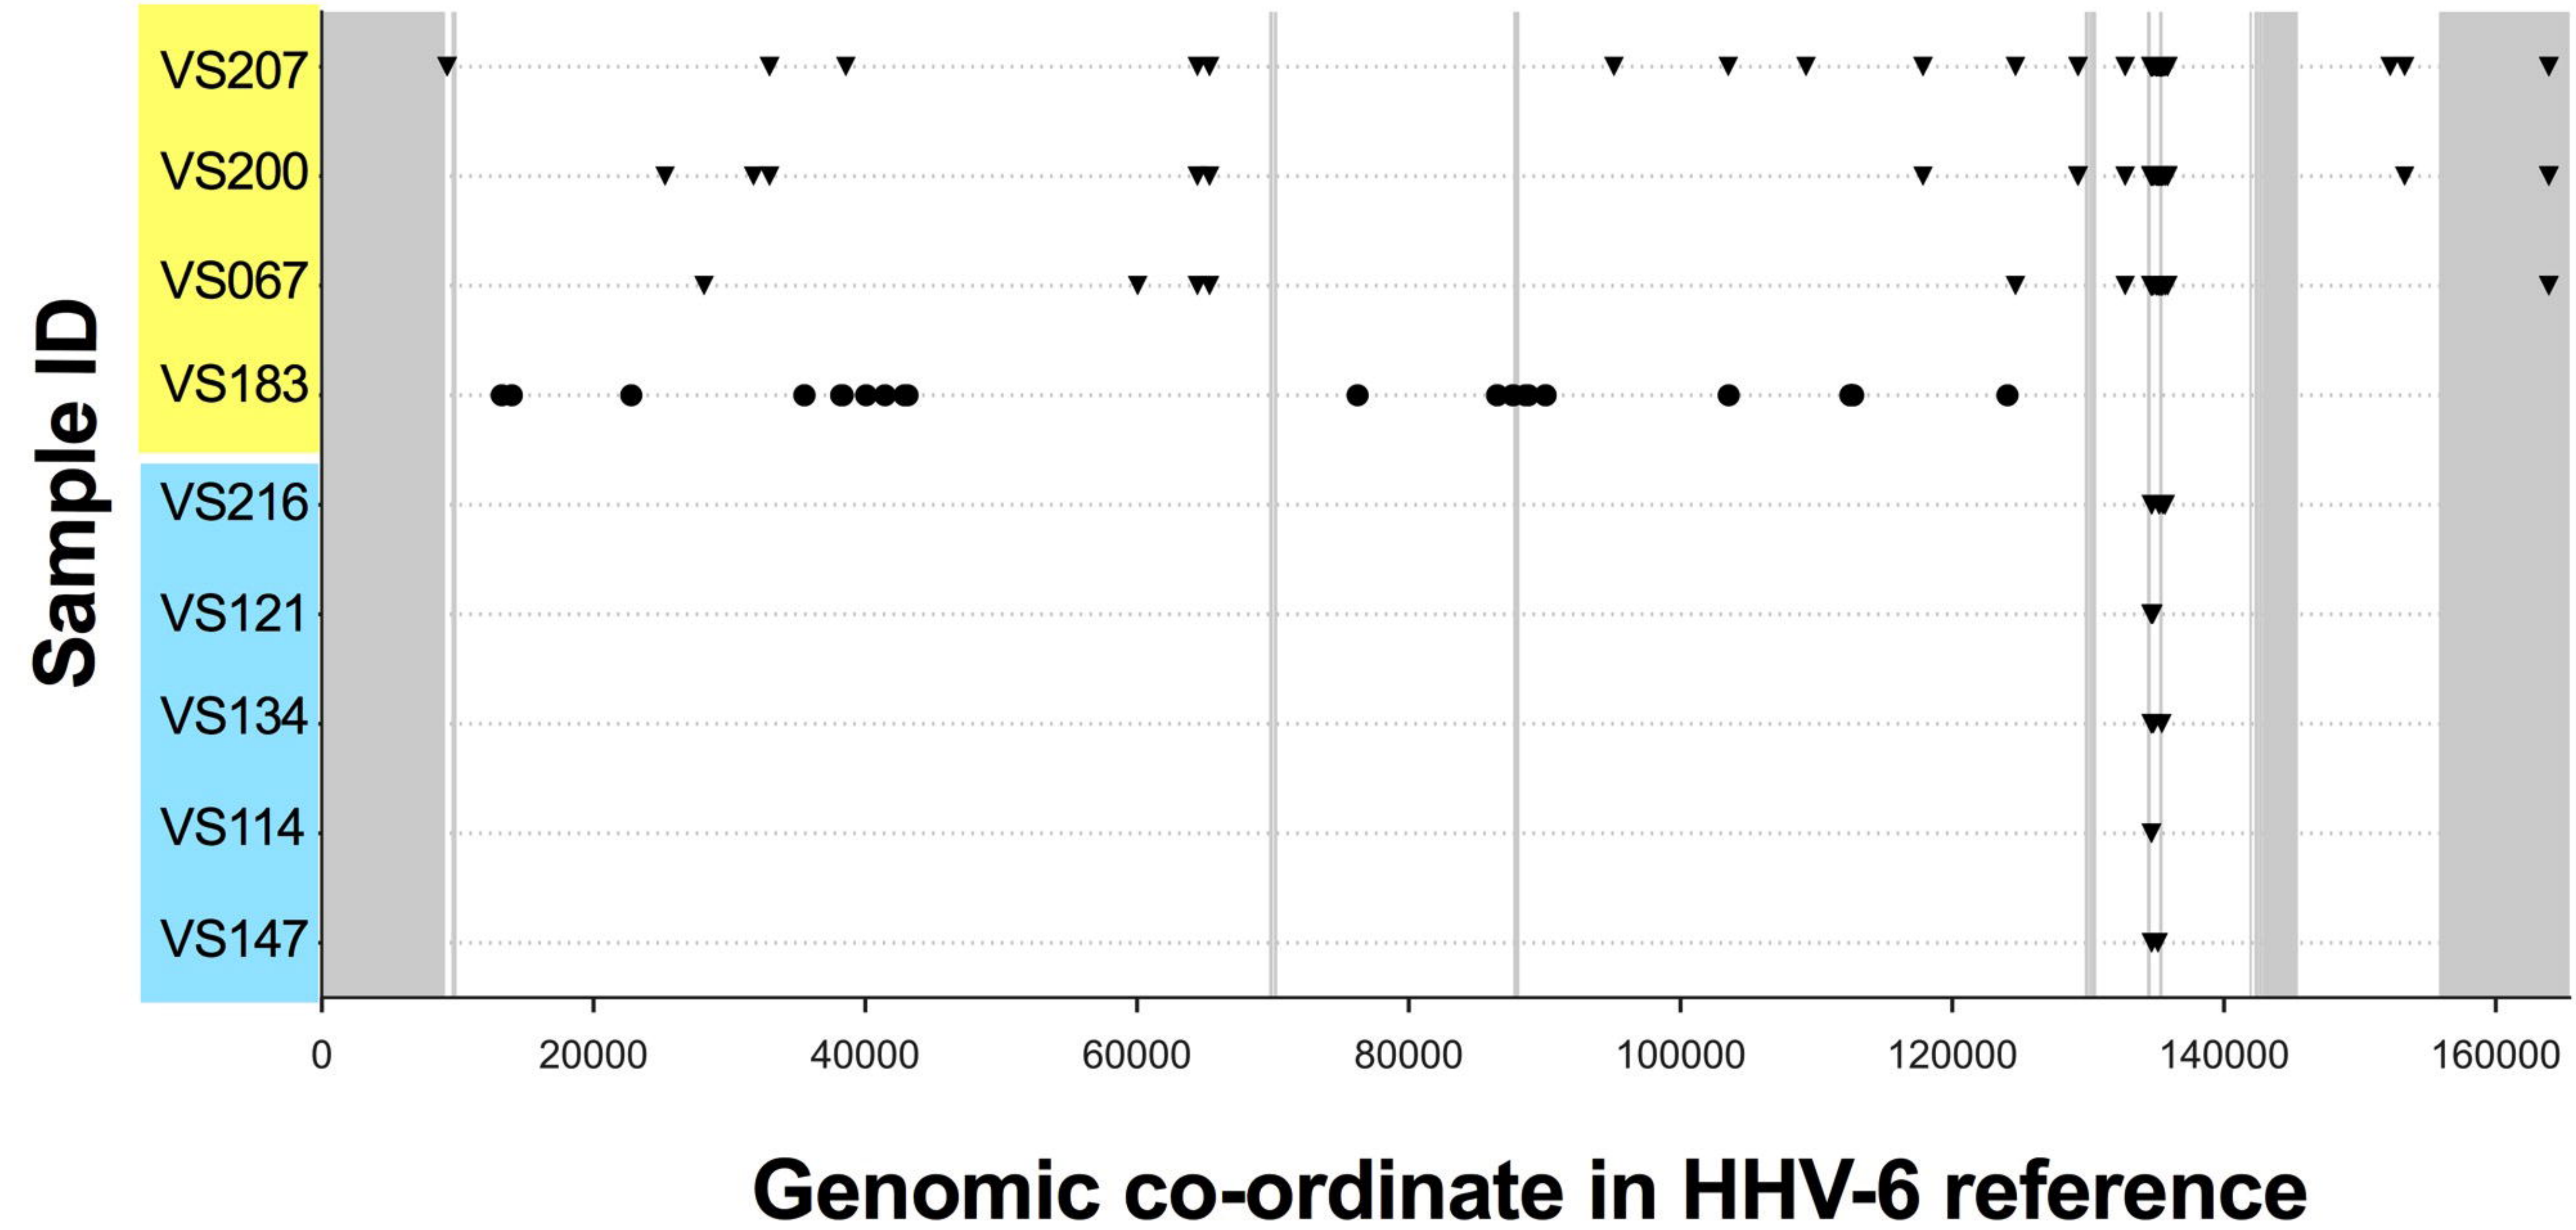

Organism(s) identified by metagenomic sequencing

Phage / plant / animal virus?

YES

NO

Organism with definite or potential pathogenic consequences in humans?

NO

YES

Read count above a defined threshold

NO

YES

Appropriate genome coverage?

NO

YES

Confirmed ID? (e.g. by BLAST)

NO

YES

Appropriate clinical context?

NO

YES

Appropriate diagnostic sample?

NO

YES

Probable clinical, laboratory or environmental contaminant?

YES

NO

Alternative robust and plausible diagnostic result?

YES

NO

ACCEPT LIKELY DIAGNOSIS

CONSIDER  
ALTERNATIVE  
DIAGNOSIS

Bioinformatics approach

Clinical / diagnostic microbiology interpretation

bioRxiv preprint doi: <https://doi.org/10.1101/250095>; this version posted March 26, 2018. The copyright holder for this preprint (which was not certified by peer review) is the author/funder, who has granted bioRxiv a license to display the preprint in perpetuity. It is made available under aCC-BY-NC-ND 4.0 International license.
